# Supplementary material for: Ultrahigh-rate quasi-solid-state Zn-air batteries enabled by atomically dispersed Co site electrocatalyst and organhydrogel electrolyte
Source: Research Square preprint supplement (doi:10.21203/rs.3.rs-1096489/v1), 2021-12-01
Supplement: Supplementary file 1 [file 2d8c1082104e03545567c02e.docx]

## Supplementary Information for

**Ultrahigh-rate quasi-solid-state Zn-air batteries enabled by atomically dispersed Co site electrocatalyst and organhydrogel electrolyte**

Qichen Wang1,2,7, Qingguo Feng3,7, Shuaihao Tang4, Yongpeng Lei1,2,

Liang Xu4, Yu Xiong2, Guozhao Fang5, Yuchao Wang1, Peiyao Yang1, Jingjing Liu2, Wei Liu6, Xiang Xiong1

In generally, battery polarization at low temperature includes the following three aspects: activation polarization, ohmic polarization, and concentration polarization. As known, the battery voltage is mainly affected by both polarization and internal resistance. Both of polarization and internal resistance are severely restricted by working temperature. In the low-potential window that just over the equilibrium potential, the electrochemical reaction is mainly in a state where the molecules are activated to allow the reaction to proceed. The overpotential is mainly used to overcome the activation energy of the reaction, causing the activation polarization. The decrease of electrolyte ionic conductivity, the electron transport in the electrode and interface also decreases at low temperatures, which result in huge increase in the Ohmic polarization. At high applied potential, the ion diffusion rate of electrolyte is slower than the electrochemical reaction rate due to the mass transport limitation, resulting in the concentration polarization.

The output voltage is a critical parameter in electrochemical batteries. Based on the second law of thermodynamics, low temperate undoubtedly lower the charge (ion and electron) transport in electrode and electrolyte, leading to a considerable resistance enhancement.

**From the point of thermodynamics factor:**

ΔG = -nEF

Where ΔG is the Gibbs free energy, n is the of transferred electron number, E is the battery voltage and F is the Faraday constant. Nernst equation describes the relationship between battery voltage and working temperature could be established as follow:

In this equation, E stands for the actual measured voltage, represents the battery voltage at the standard state, T is the working temperature and R, n, and F are all constants. In general, the delivered voltage conforms to the Nernst equation. When the battery is discharging by electrochemical reactions, < 0, > 0 would be obtained. The decrease in T leads to a decrease in, which will cause a decrease in the E. Consequently, the decrease in delivered voltage result in the energy efficiency loss of battery.

**From the point of kinetic factor:**

The ionic conductivity is another dominant aspect in an electrochemical battery kinetics. The ionic diffusivity (Di) is commonly used to quantitatively assess the movement of ions. The connection between the Arrhenius parameter and the ionic diffusivity are as follow:

where D0 is the estimated pre-factor, ΔGθ is the energy barrier, kB is the Boltzmann constant, and ζ is the diffusion length. The Di is also related to the diffusion time (t).

**Supplementary Figures**
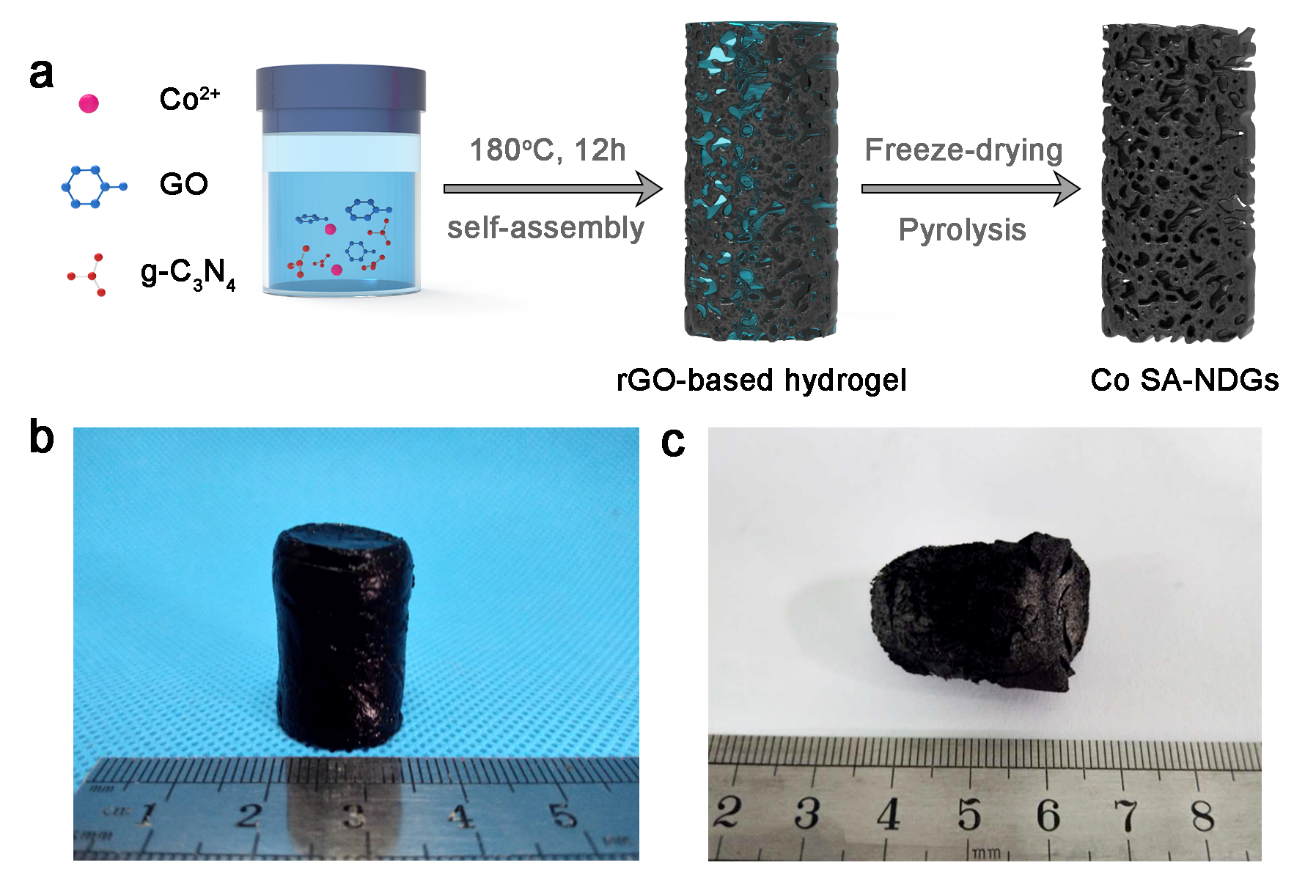


**Supplementary** **Figure 1**. (a) Schematic illustration of the fabrication process for Co SA-NDGs. Optical photograph of (b) rGO-based hydrogel and (c) Co SA-NDGs.


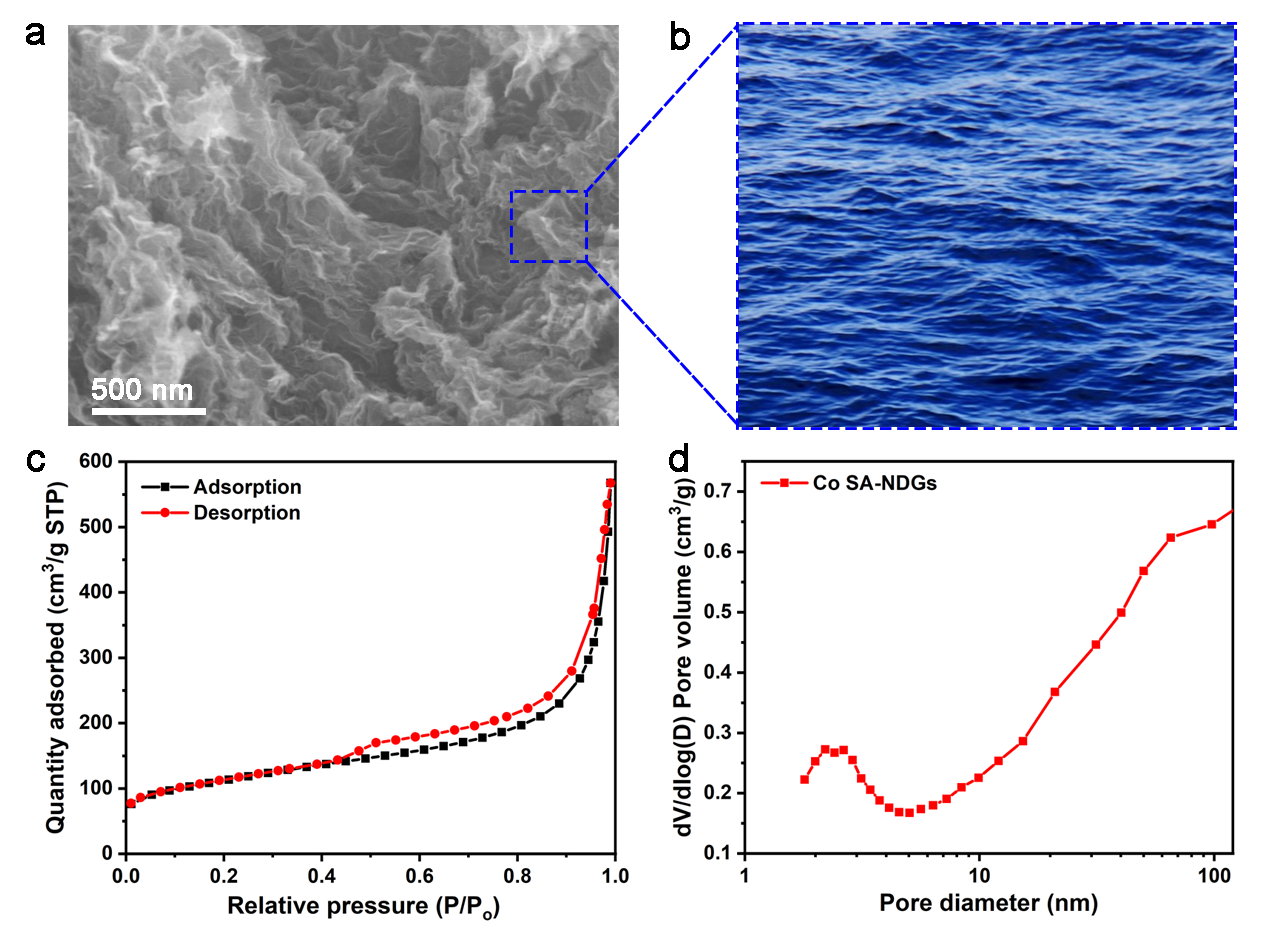


**Supplementary Figure 2**. (a) SEM image of Co SA-NDGs. (b) Fluctuating sea level. (c) N2 adsorption/desorption isotherms and (d) corresponding pore size distribution of Co SA-NDGs.


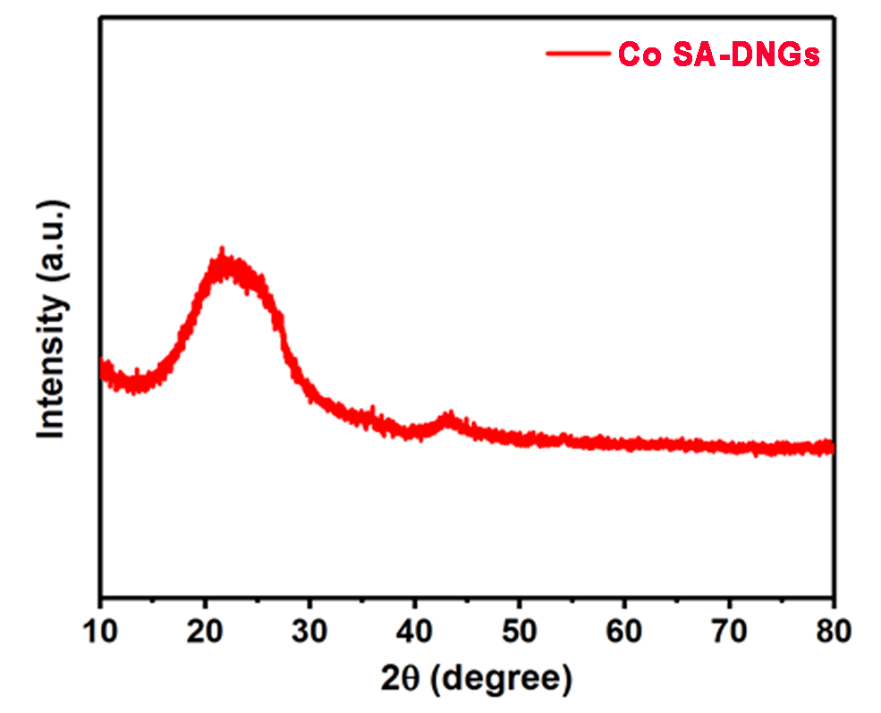


**Supplementary Figure 3**. XRD pattern of Co SA-NDGs.


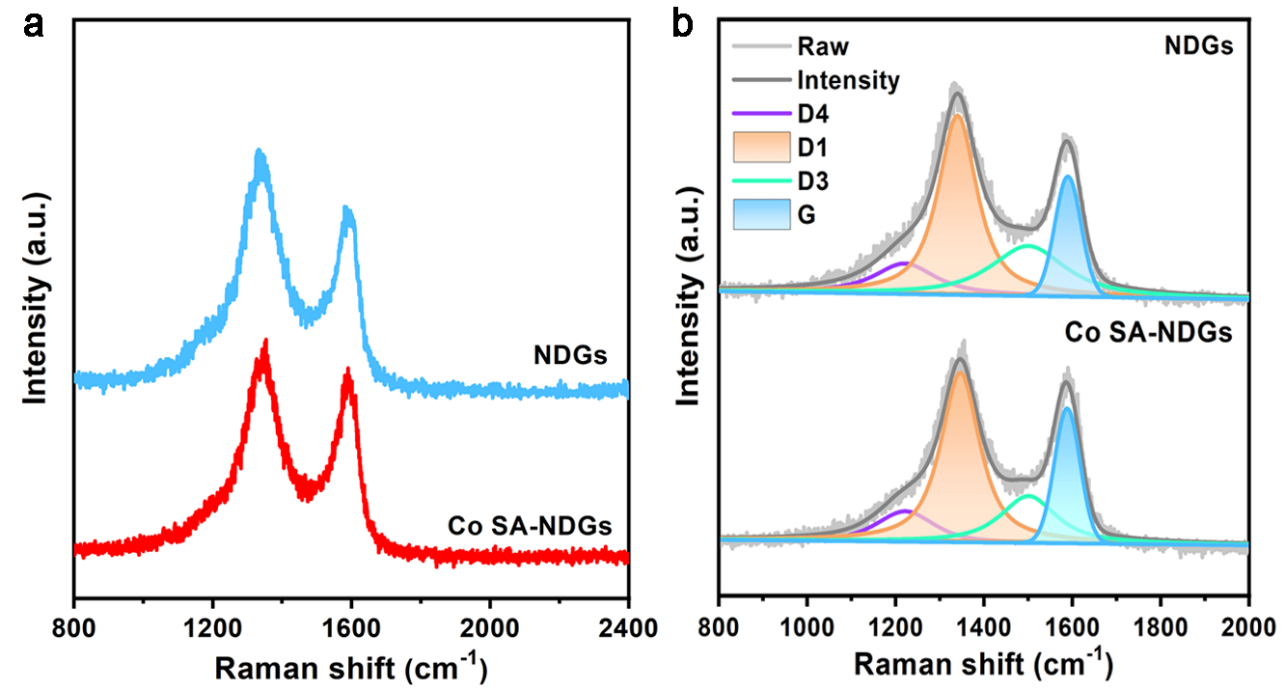


**Supplementary Figure 4**. (a) Raman spectra and (b) Curve fitting results of NDGs and Co SA-NDGs.

Two broad peaks (about 1350 and 1580 cm-1) were observed, corresponding to the D-band and G-band, respectively. To obtain valuable information of the structural defects, the Raman spectra have been fitted with four bands (D1, D3, D4, and G). Specifically, the G band corresponds to the defect-free sp2 carbon. The D1 band is associated with the small crystallite sizes, grains, or edge plane defects of graphite domains. The D3 band is assigned to amorphous carbon, while the presence of D4 band has been tentatively related to the existence of polyene-like structures or ionic impurities. The intensity ratio of D1 and G band of Co SA-NDGs is high up to 3.13, suggesting the abundant structural defects (e.g., edge and in-plane atomic vacancy, etc).


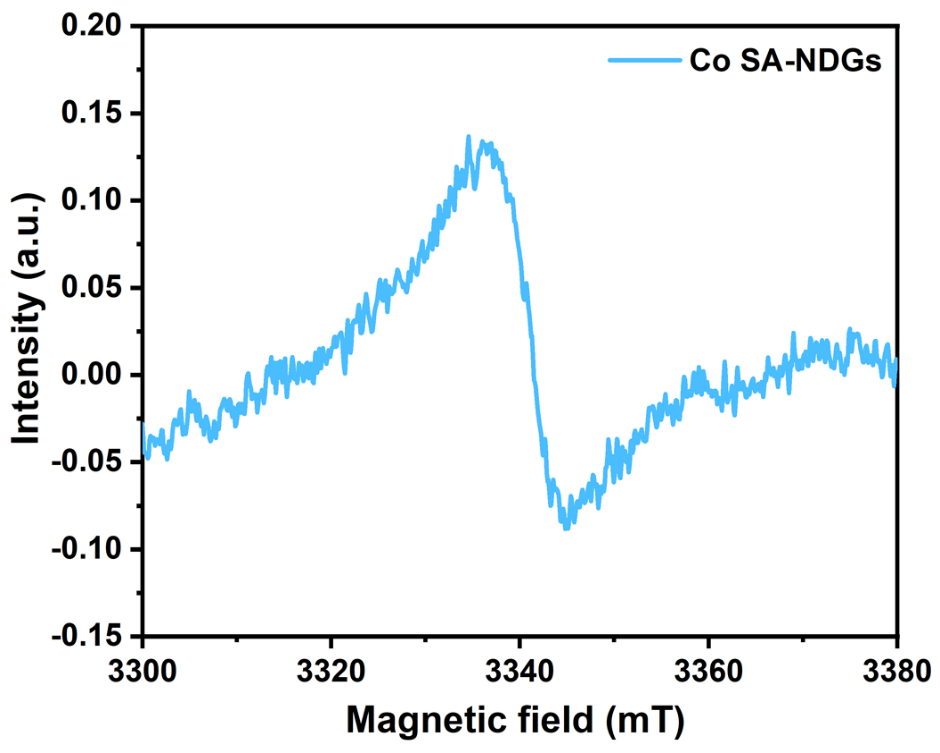


**Supplementary Figure 5**. EPR spectra of Co SA-NDGs.


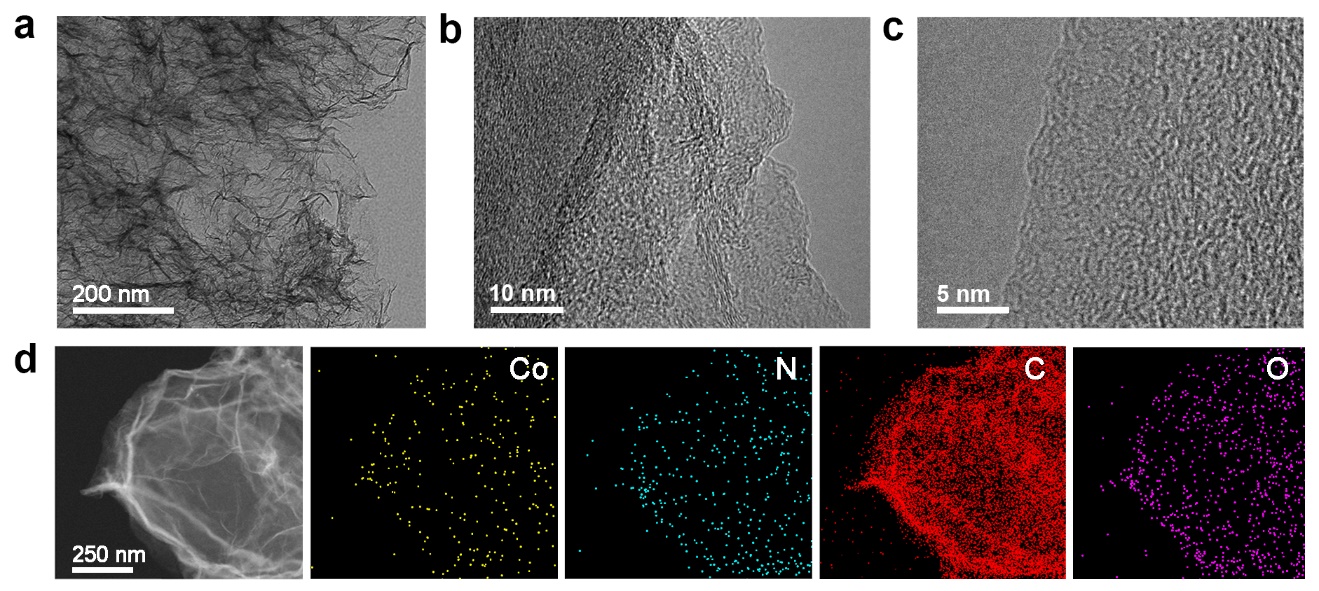


**Supplementary Figure 6**. (a-c) TEM and HRTEM images and (d) element mapping images of Co SA-NDGs.


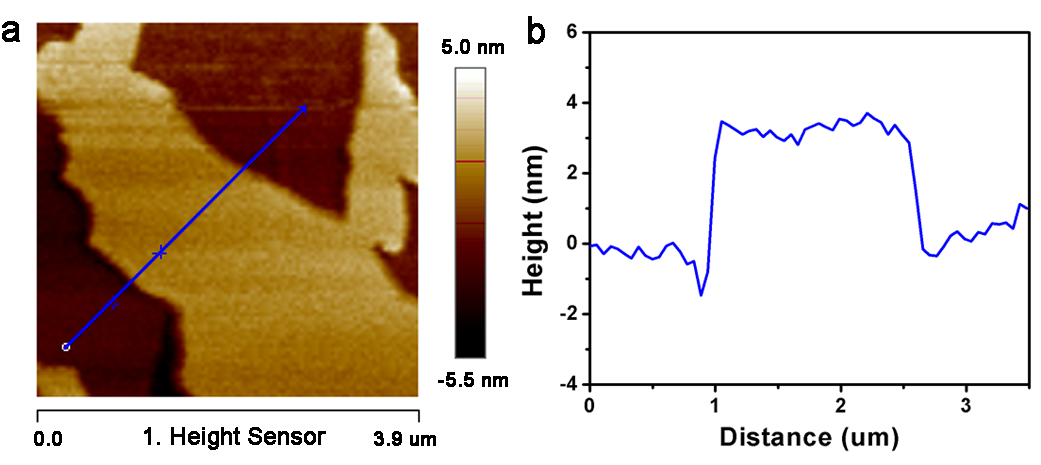


**Supplementary Figure 7**. (a) AFM image of Co SA-NDGs. (b) The corresponding thickness measurement.


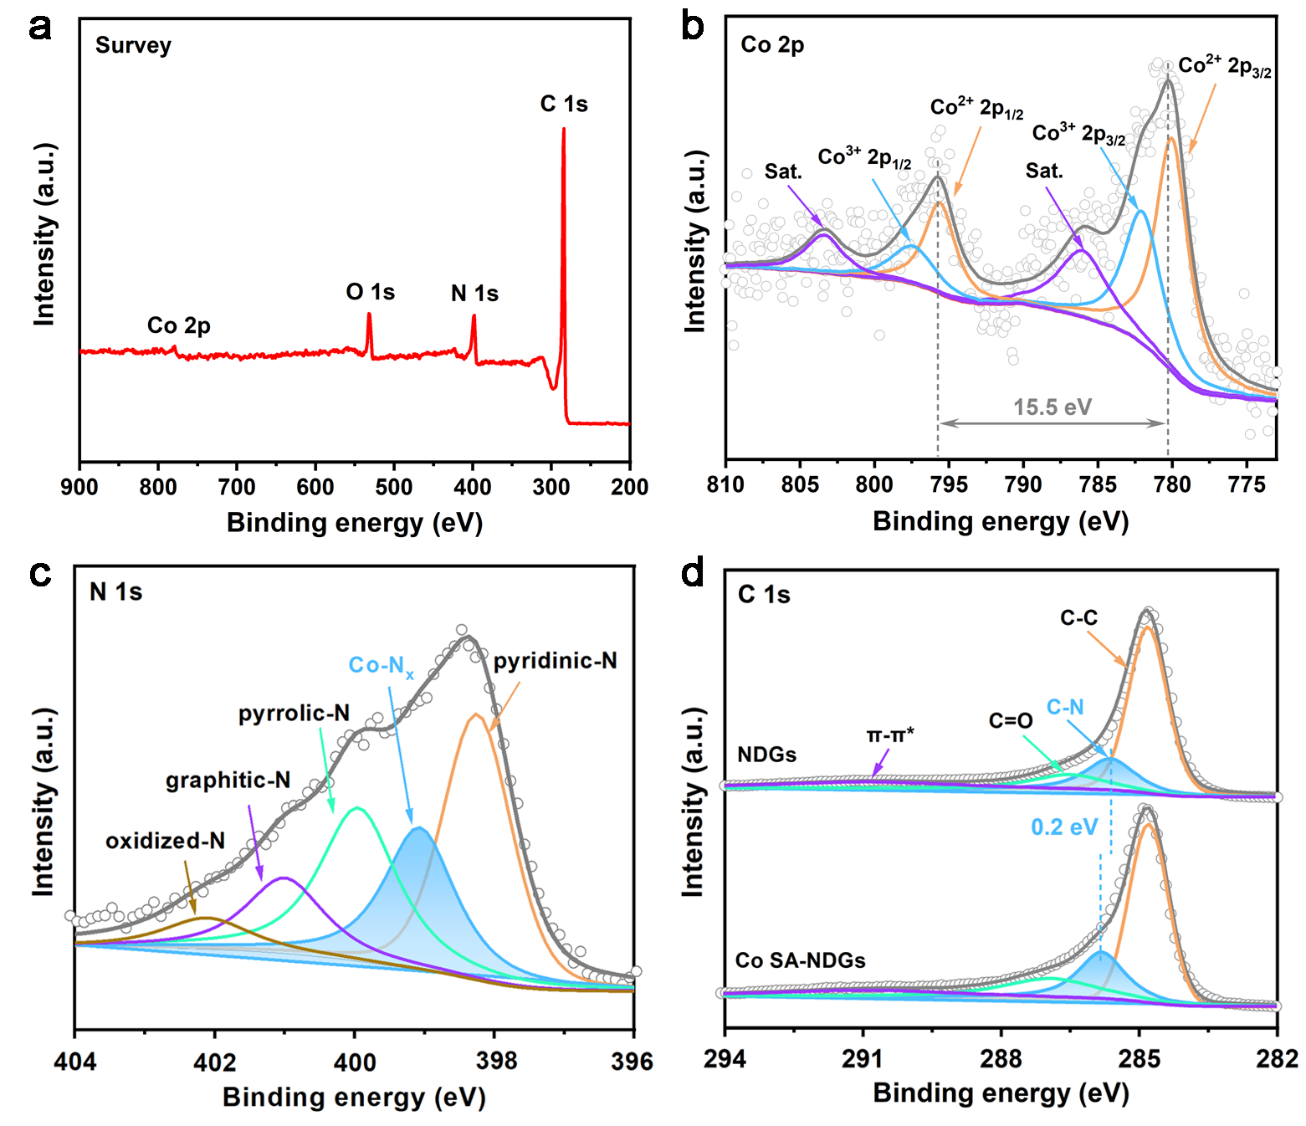


**Supplementary Figure 8**. (a) XPS survey spectrum and (b) Co 2p spectrum for Co SA-NDGs.


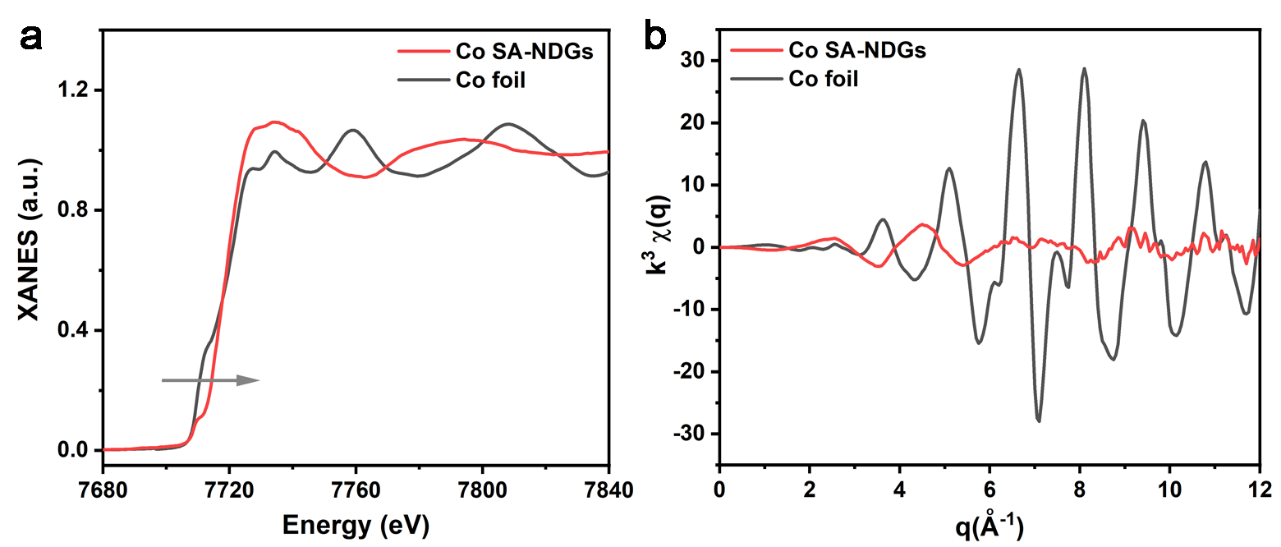


**Supplementary Figure 9**. (a) Normalized XANES spectra at the Co K-edge and (b) Corresponding EXAFS fitting curves of Co SA-NDGs and Co foil at k space.


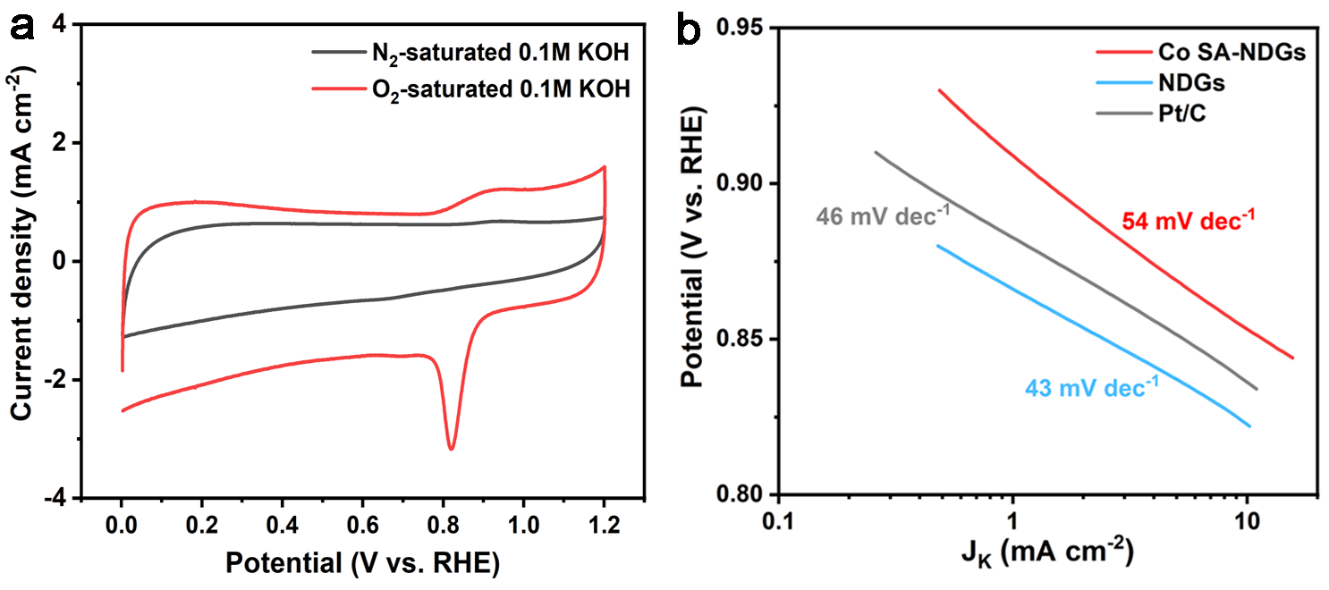


**Supplementary Figure 10**. (a) CV curves of Co SA-NDGs at N2/O2-saturated 0.1 M KOH. (b) Tafel slopes for NDGs, Co SA-NDGs and Pt/C.


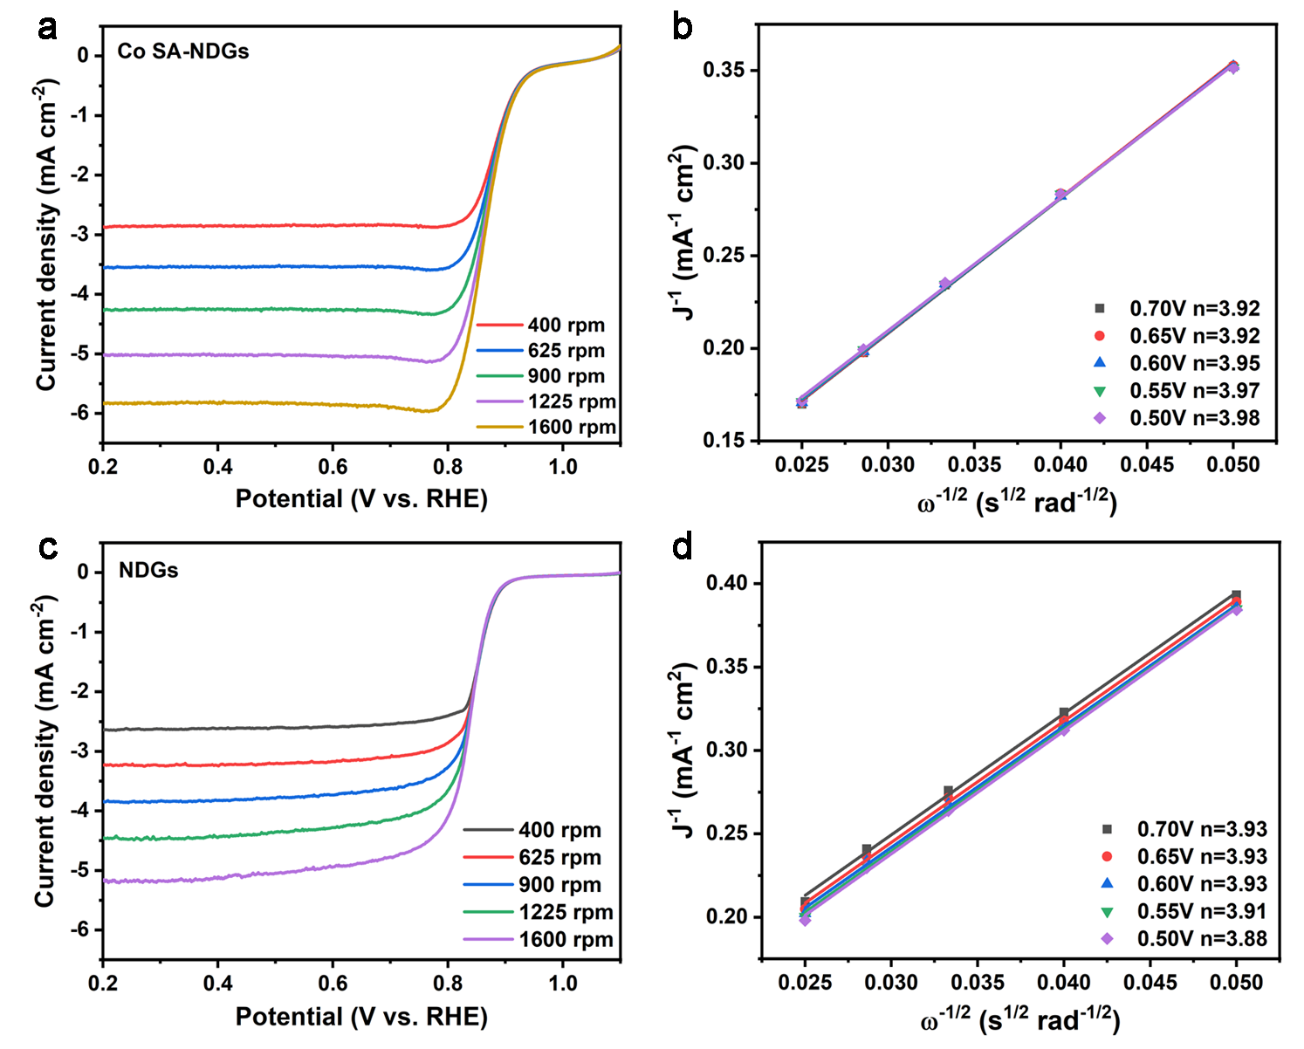


**Supplementary Figure 11**. LSV curves recorded at various rotation rates and Koutecky-Levich (K-L) plots (J-1 vs. ω-1/2) at different potentials for (a,b) Co SA-NDGs and (c,d) NDGs.


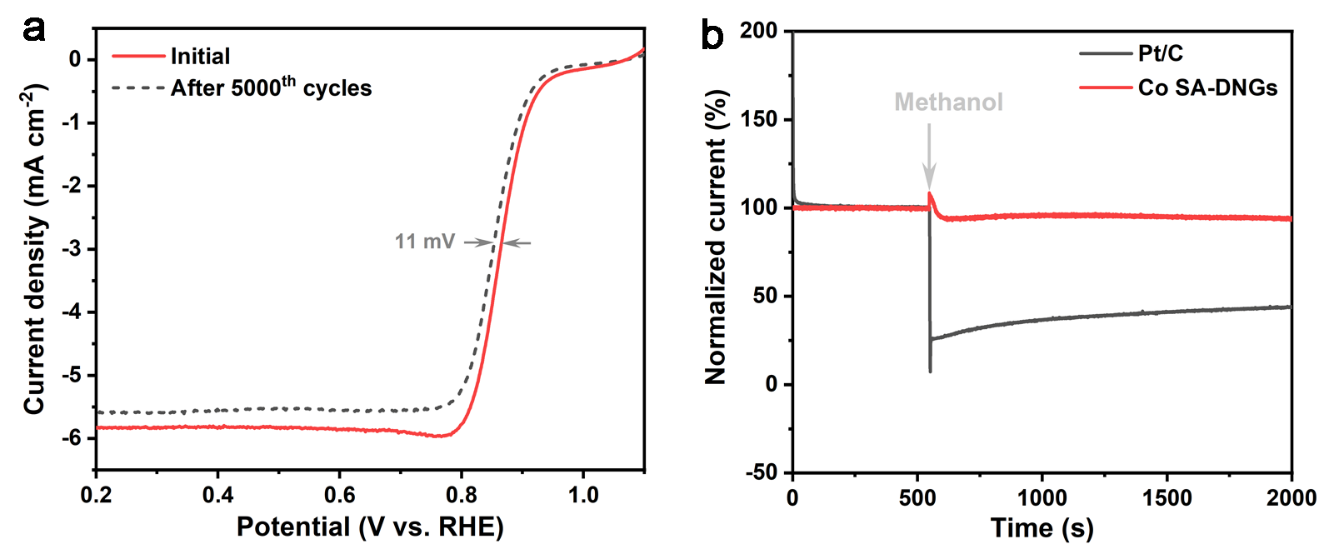


**Supplementary Figure 12**. (a) ORR polarization curves of Co SA-NDGs before and after accelerated degradation measurement. (c) I-t curves for Co SA-NDGs and Pt/C in O2-saturated 0.1 M KOH without and with methanol.


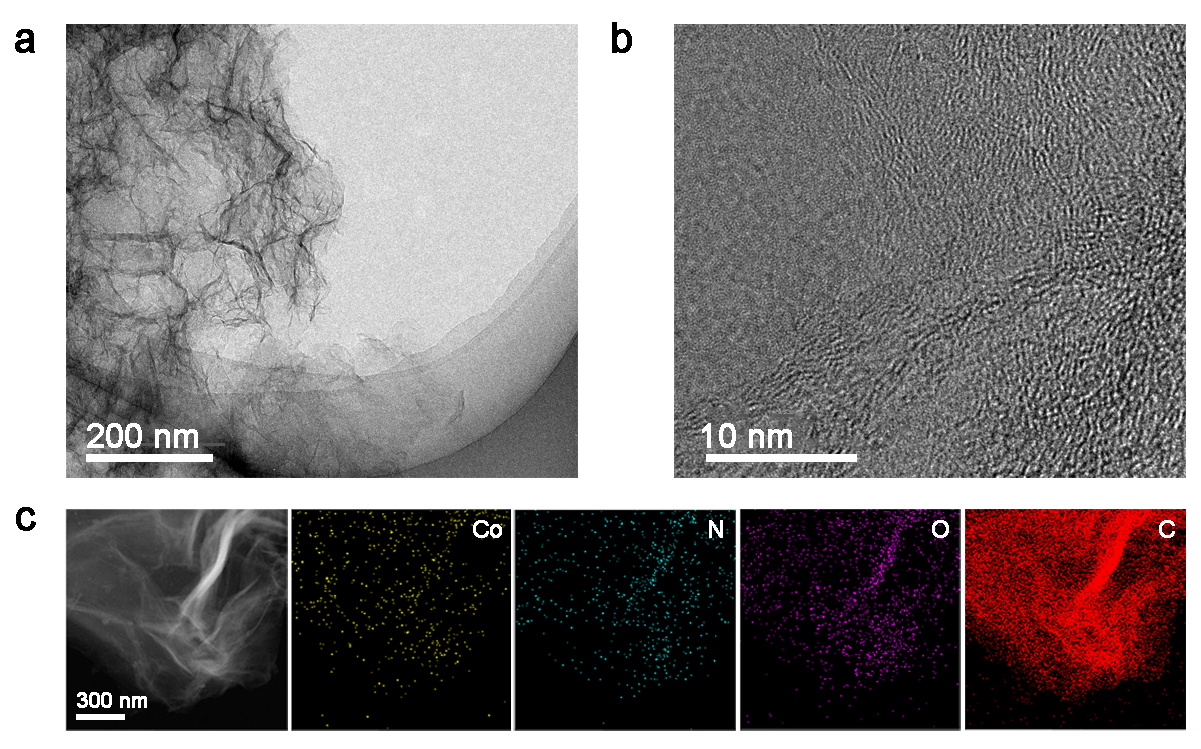


**Supplementary Figure 13**. (a) TEM, (b) HRTEM image and (c) element mapping images of Co SA-NDGs after ORR stability measurement.


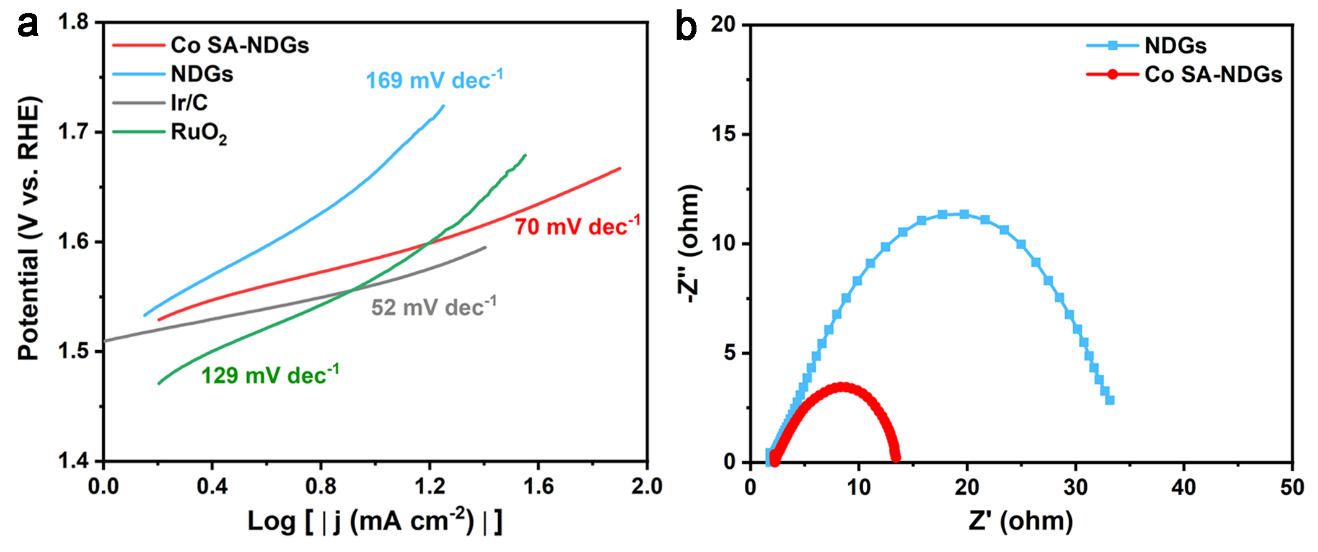


**Supplementary Figure 14**. (a) Tafel slopes of Co SA-NDGs, NDGs, Ir/C and RuO2 for OER. (b) EIS results of Co SA-NDGs and NDGs.


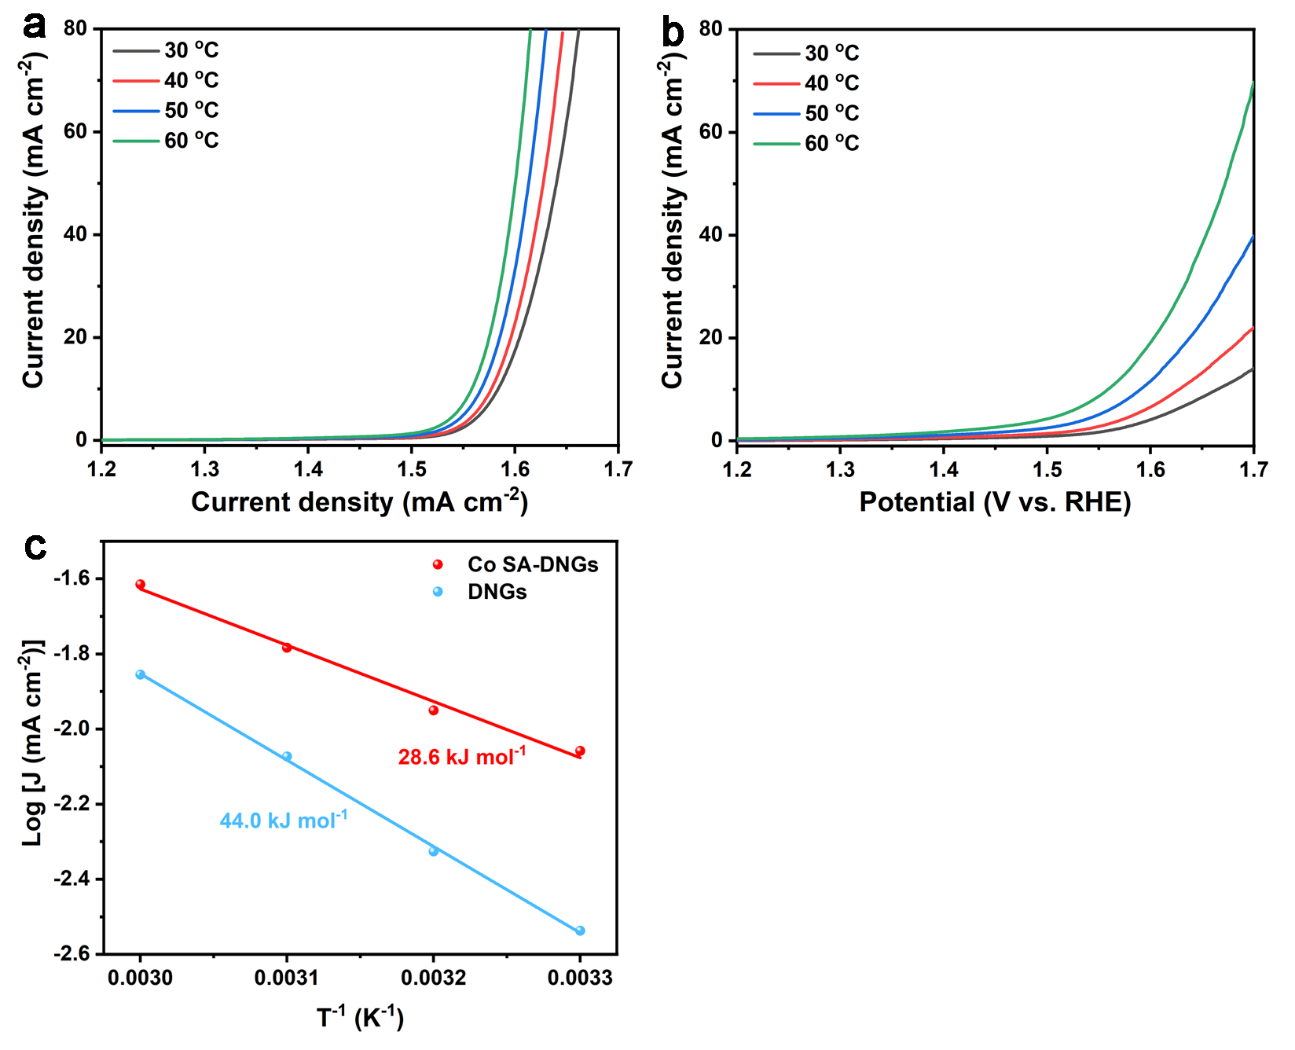


**Supplementary Figure 15**. LSV curves of (a) Co SA-NDGs and (b) NDGs measured at different temperature.

The electrochemical activation energy (Ea) of OER can be estimated by the Arrhenius relationship:

where j is the current density at the overpotential of 350 mV, R is the universal gas constant (8.314 J K-1 mol-1), T is the temperature. The Ea could be calculated from the slope of the fitted Arrhenius plot.


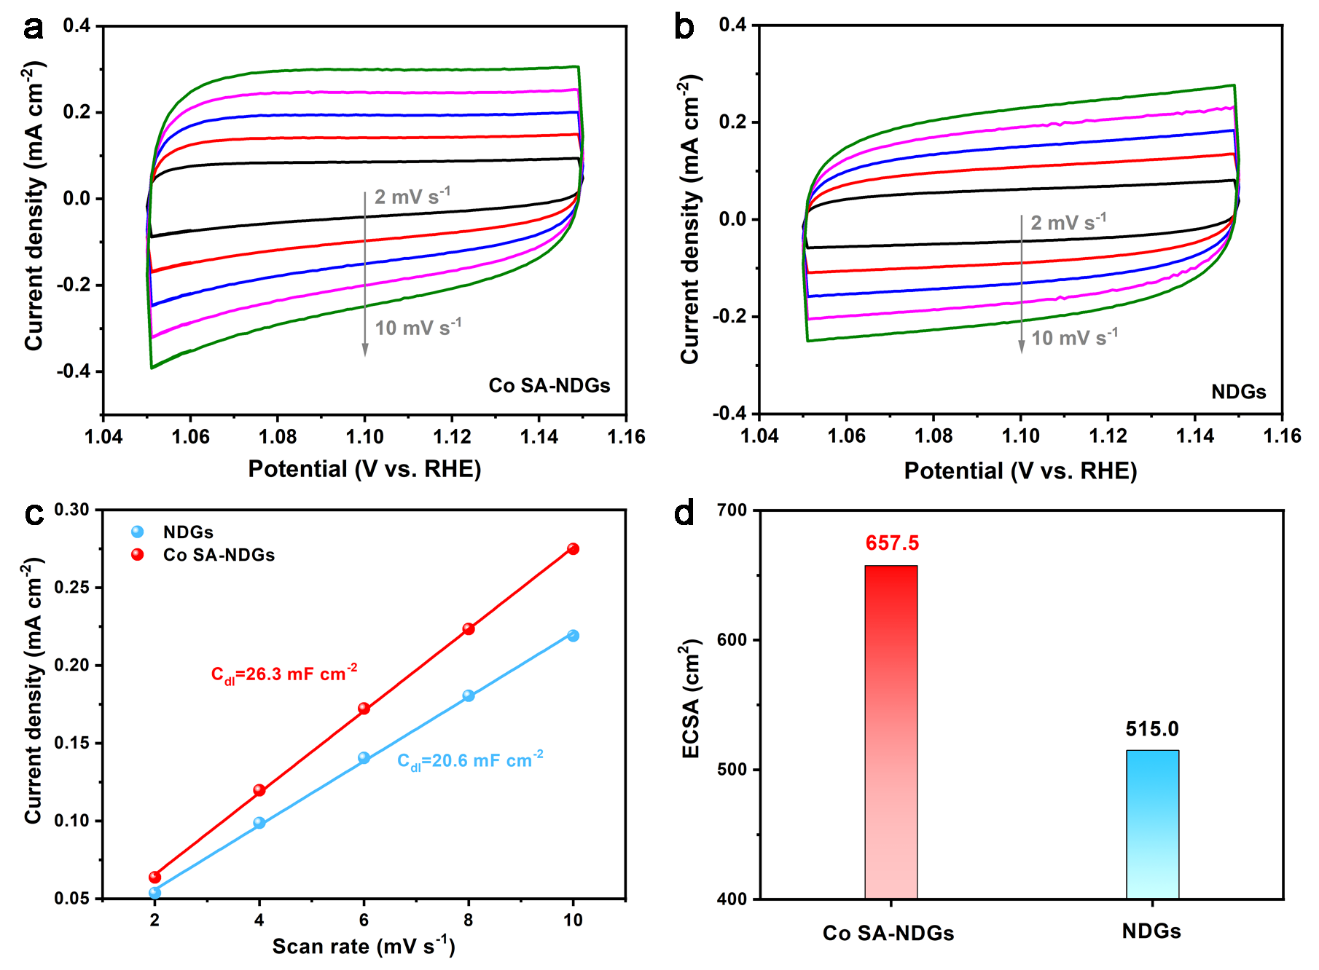


**Supplementary Figure 16**. CV curves of (a) Co SA-NDGs and (b) NDGs at 2, 4, 6, 8 and 10 mV s-1. (c) The capacitive current measured at 1.15 V plotted as a function of scan rate. (d) Comparison of ECSA of Co SA-NDGs and NDGs. A specific capacitance of 1 cm2 flat surface-area (Cs) generally corresponds to 40 μF cm-2. Therefore, the ECSA can be obtained from ECSA = Cdl of catalyst (mF cm-2)/0.04 (mF cm-2).


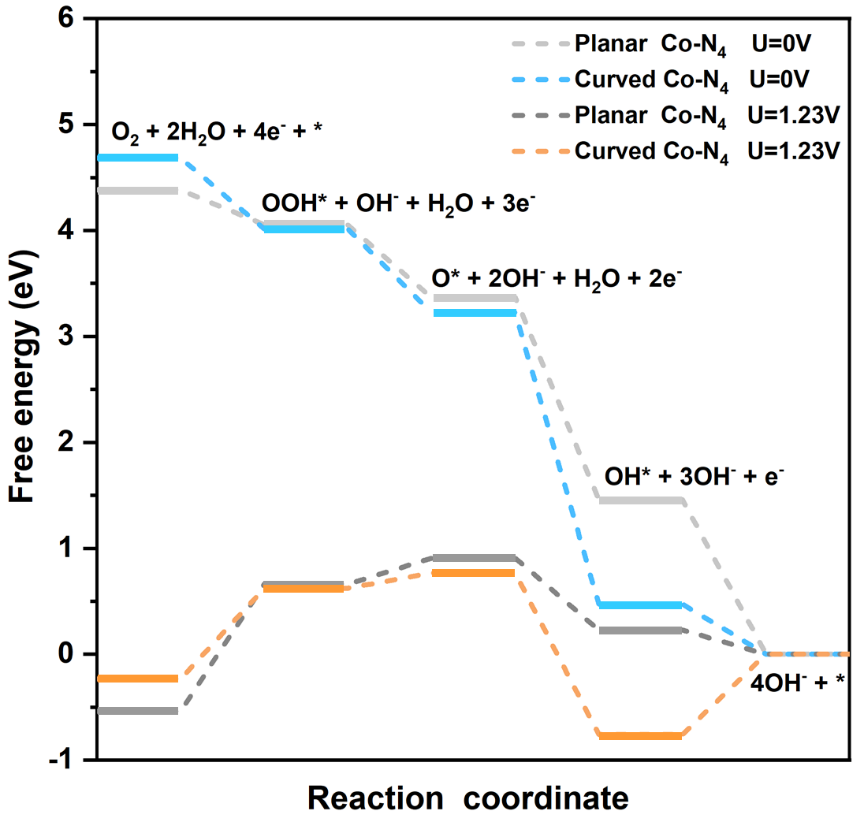


**Supplementary Figure 17**. Free energy diagram of the ORR on planar Co-N4 site and curved Co-N4 site in alkaline media.


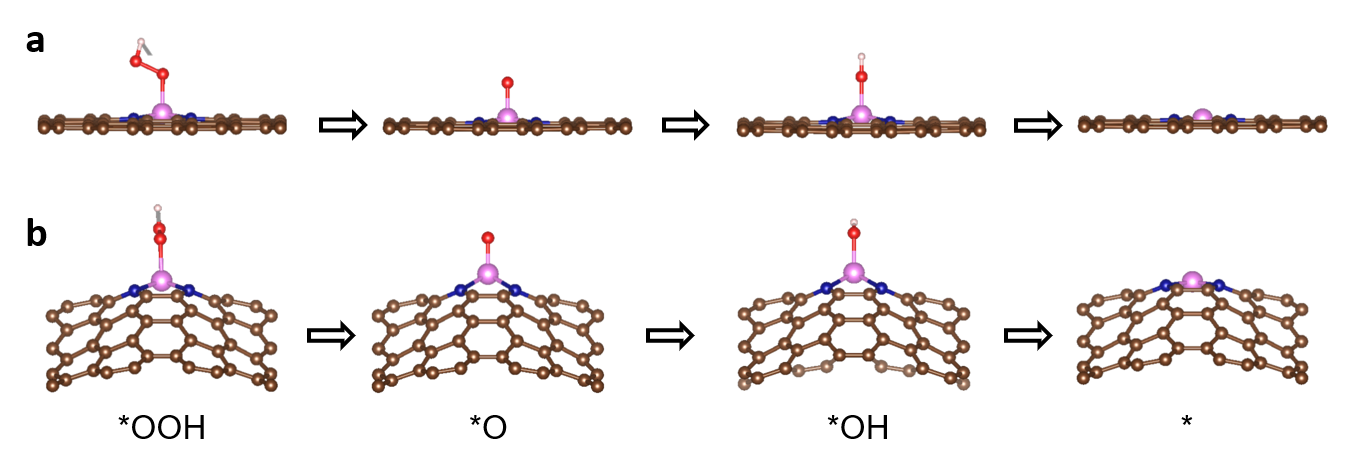


**Supplementary Figure 18**. The optimized intermediate species along the reaction pathway of ORR on (a) planar Co-N4 and (b) curved Co-N4.

**
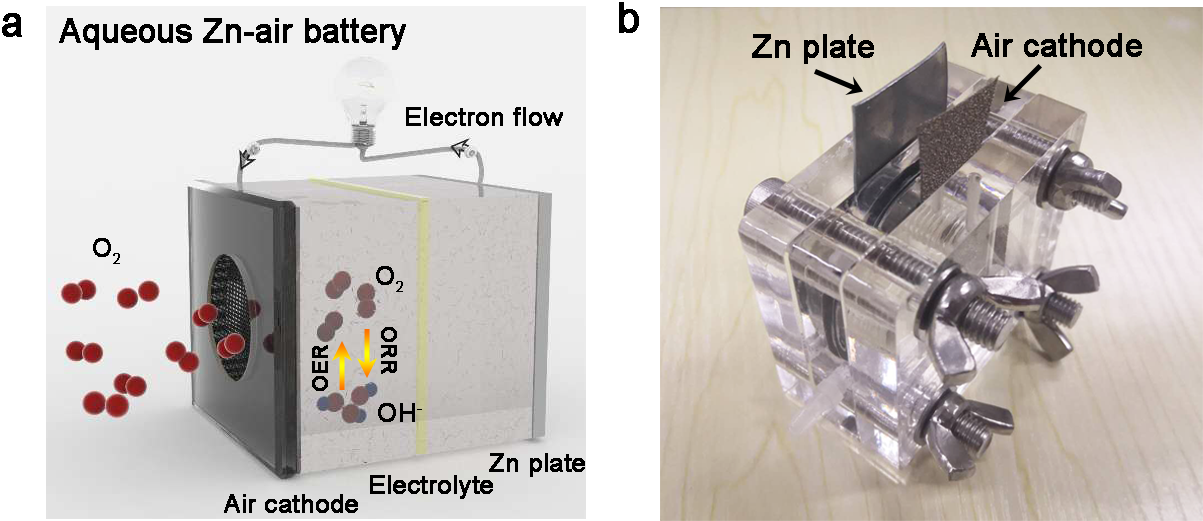
**

**Supplementary Figure 19**. (a) Schematic diagram of aqueous ZABs. (b) Optical photograph of the assembled ZABs.

**
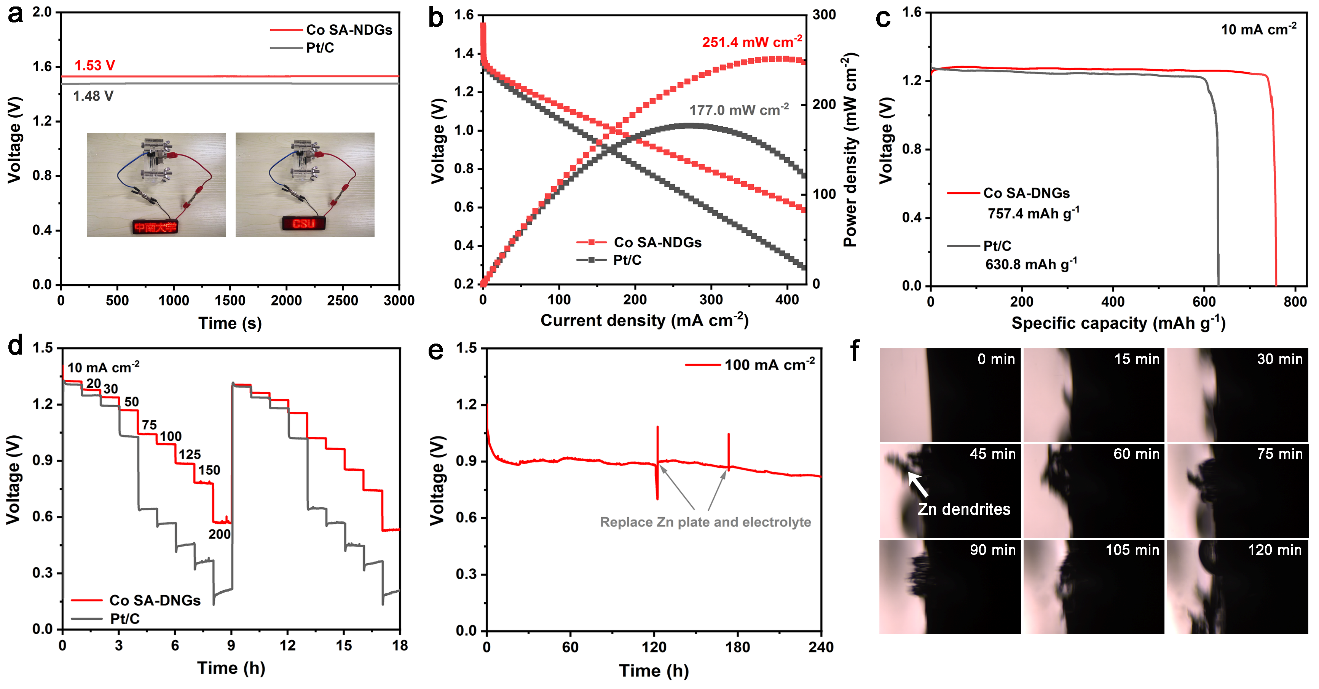
**

**Supplementary Figure 20**. (a) OCV curves of the aqueous ZABs with Co SA-NDGs and Pt/C. Inset shows the photograph of practical application of the aqueous ZABs. (b) Galvanostatic discharge curves and the corresponding power density curves of aqueous ZABs using Co SA-NDGs and Pt/C. (c) Specific capacities at 10 mA cm-2. (d) Rate performance. (e) Galvanostatic discharge curves of the aqueous ZABs with Co SA-NDGs at 100 mA cm-2. (f) In situ optical visualization observations of the interface change of the Zn/electrolyte under the discharge at 20 mA cm-2 in 6M KOH + 0.2M Zn(Ac)2.


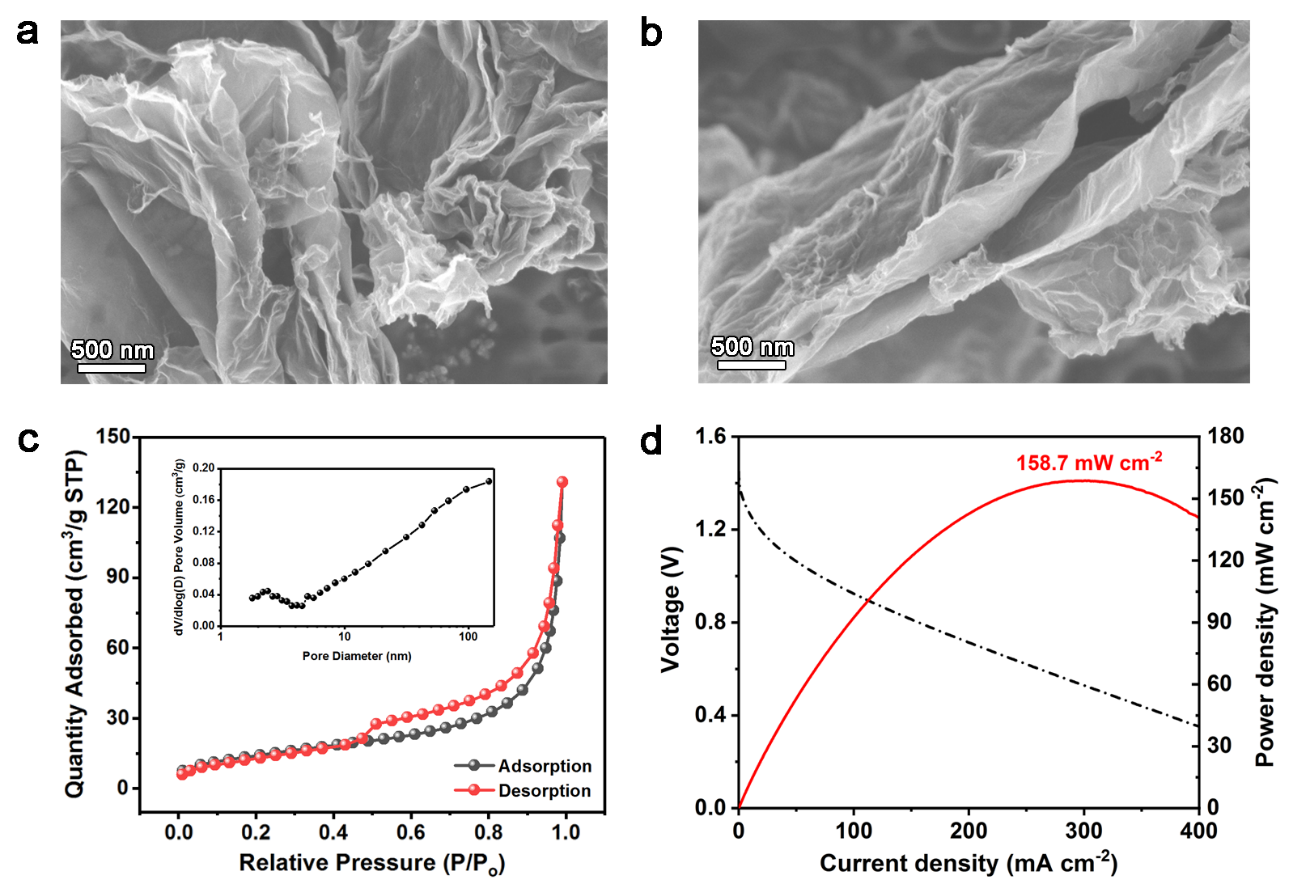


**Supplementary Figure 21**. (a,b) SEM images, (c) N2 adsorption/desorption isotherms of the control Co SA-NDGs. Inset shows the corresponding pore size distributions. (d) Galvanostatic discharge curves and the corresponding power density curves of the aqueous ZABs with the control Co SA-NDGs.


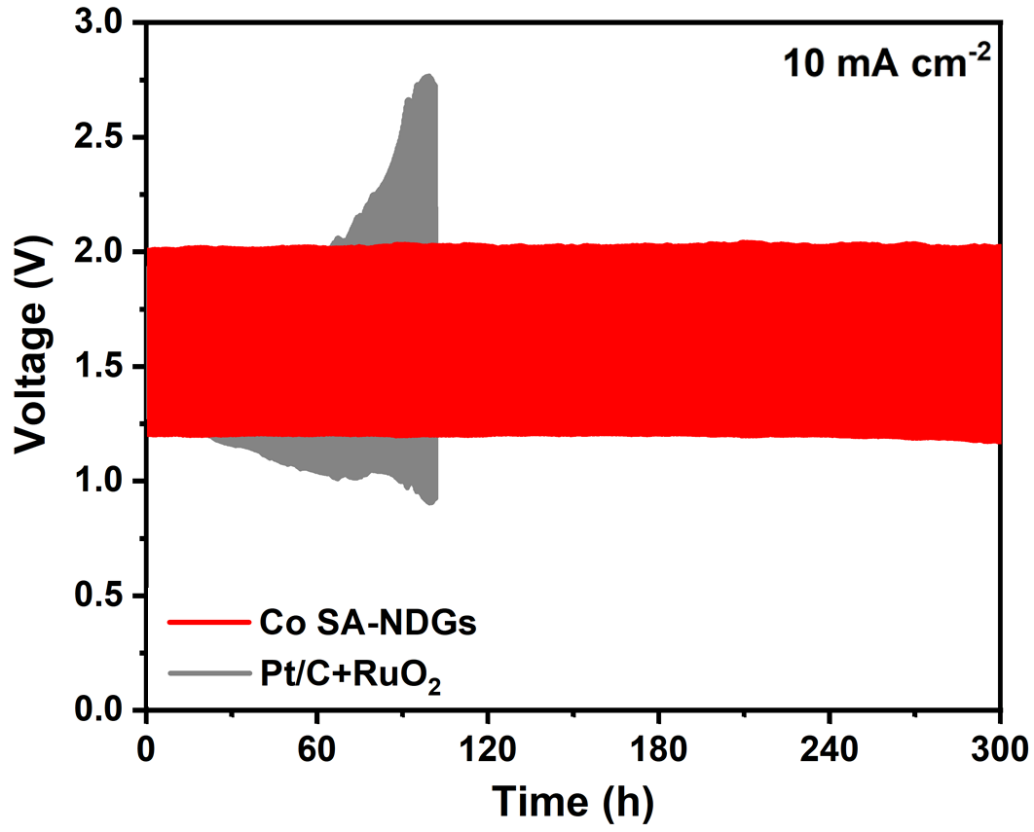


**Supplementary Figure 22**. Charging/discharging cycling performance of aqueous ZABs at current density of 10 mA cm-2.

~~
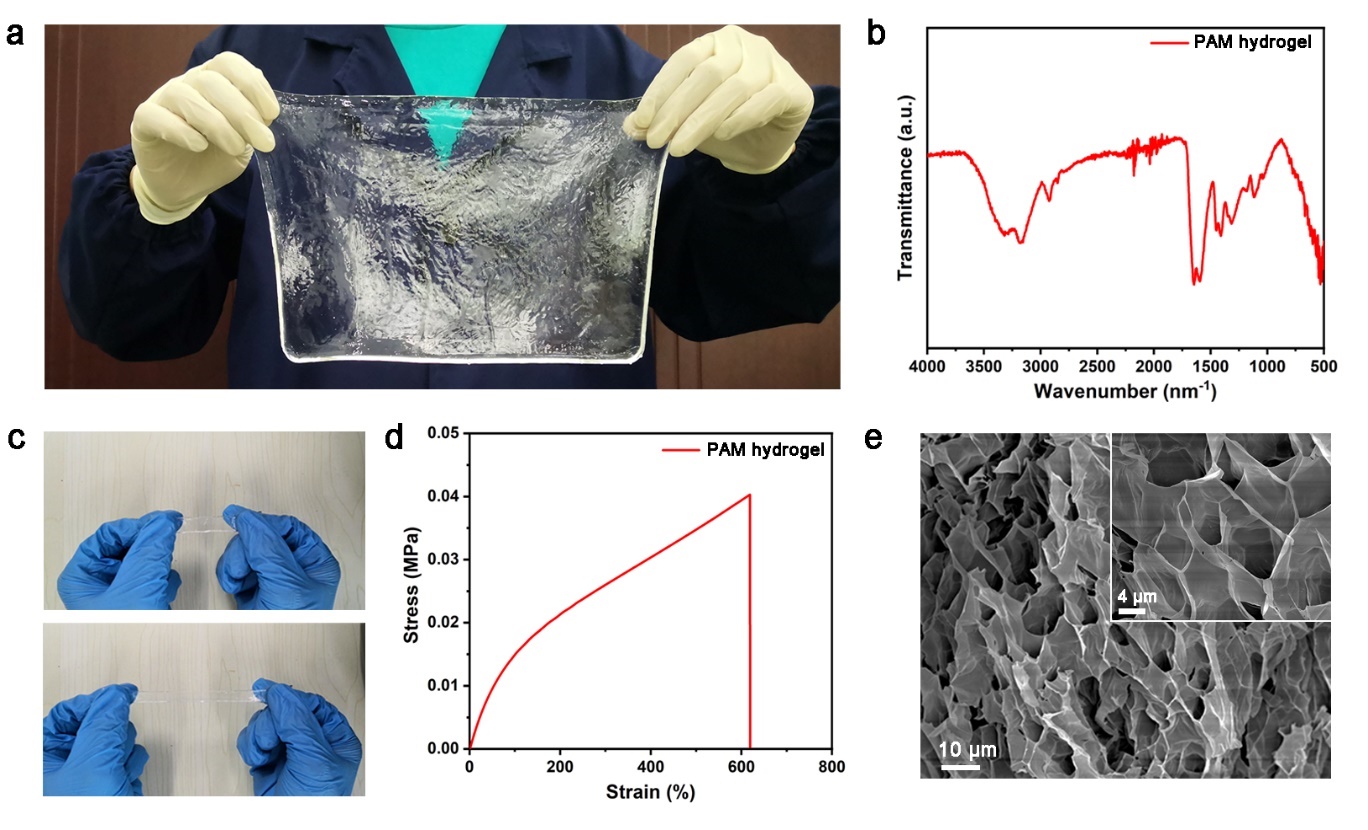
~~

**Supplementary Figure 23.** (a) Photograph of the amplification-synthesized PAM hydrogel. (b) Fourier transform infrared spectra of the PAM hydrogel. (c) Photographs of the PAM hydrogel in stretched state. (d) Tensile stress-strain curve of PAM hydrogel. (e) SEM images of the freeze-dried PAM hydrogel.

The stretchable PAM hydrogel electrolyte by free radical polymerization approach, followed by soaking in 6M KOH + 0.2M Zn(Ac)2 solution to absorb significant salt electrolyte via solvent exchange. It is noted that this method can amplify production. The PAM chains form porous network structure via covalent cross-links and hydrogen bonds. Several absorption bands (e.g., N-H stretching/bending vibration and C-O stretching vibration) are detected in Fourier transform infrared spectrum. The PAM hydrogel displays a good tensile strength and excellent stretchability (up to 780%).


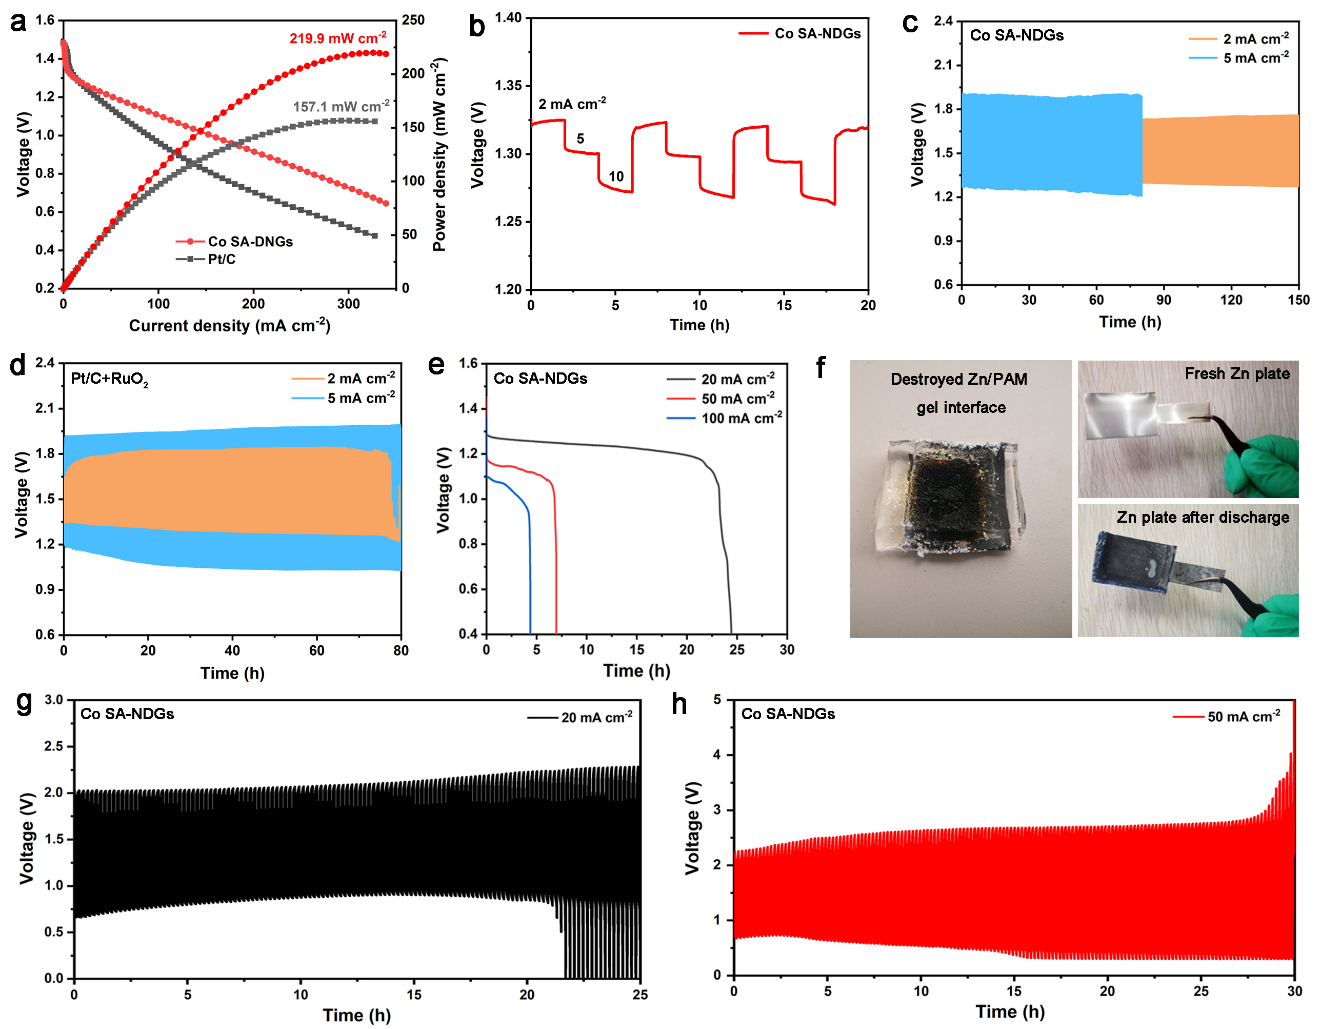


**Supplementary Figure 24.** (a) Galvanostatic discharge curves and the corresponding power density curves of the quasi-solid-state ZABs using PAM hydrogel electrolyte. (b) Rate performance. Charging/discharging performance of quasi-solid-state ZABs with (c) Co SA-NDGs and (d) Pt/C+RuO2. (e) Galvanostatic discharge voltage platforms of the quasi-solid-state ZABs with Co SA-NDGs. (f) Photographs of PAM hydrogel electrolyte and Zn plate after discharge. Charging/discharging cycling performance of the Co SA-NDGs-based quasi-solid-state ZABs at (g) 20 and (h) 50 mA cm-2 measured at room temperature.

The charging/discharging plateaus with the small overpotential are recorded at 2 and 5 mA cm-2 for the quasi-solid-state ZABs with Co SA-NDGs, by contrast to that of quasi-solid-state Pt/C+RuO2-based ZABs, validating the outstanding reversibility and robustness. The main component of Zn dendrites after cycling test is identified as ZnO (Supplementary Fig. 25).


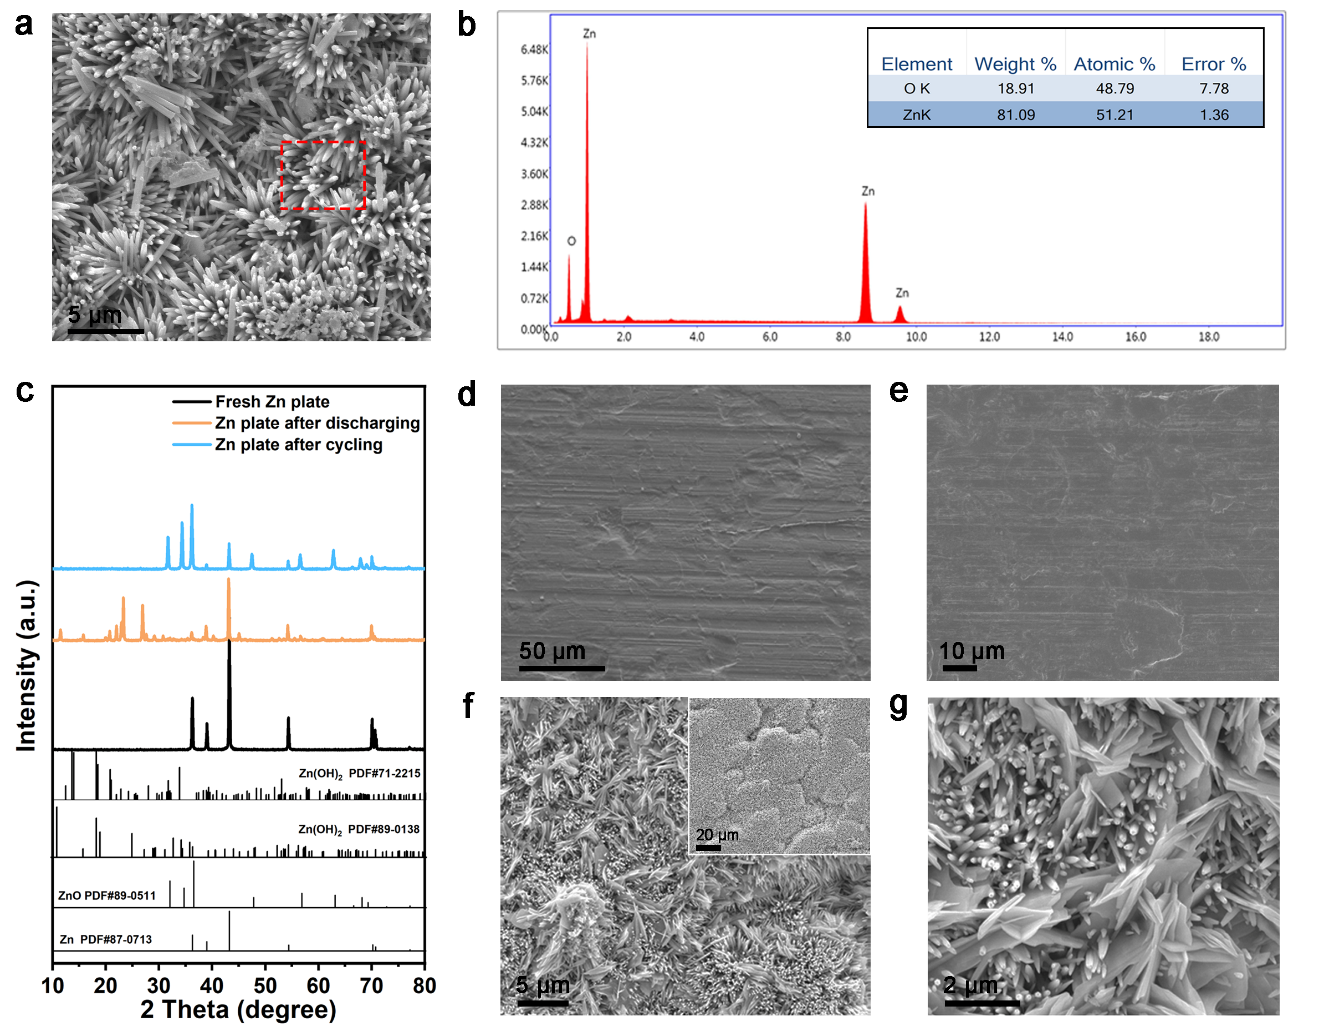


**Supplementary Figure 25**. (a) SEM image of Zn anode after cycling test. (b) The corresponding EDS results of the cycled Zn plate. (c) XRD patterns of various Zn samples. It suggests that the discharging and charging/discharging products are Zn(OH)2 and ZnO, respectively. (d,e) SEM images of fresh Zn plate. (f,g) SEM images of Zn plate after discharging.


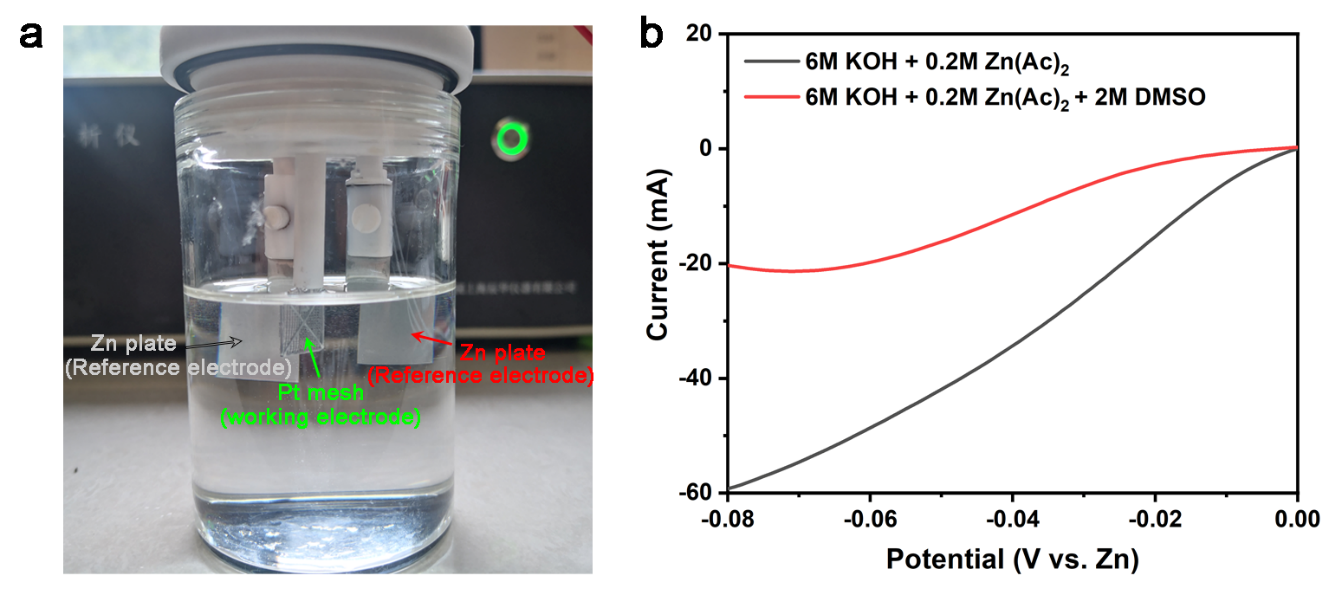


**Supplementary Figure 26**. (a) The optical photograph of three electrode system. (b) Hydrogen evolution reaction (HER) activity of Pt mesh in different electrolyte.


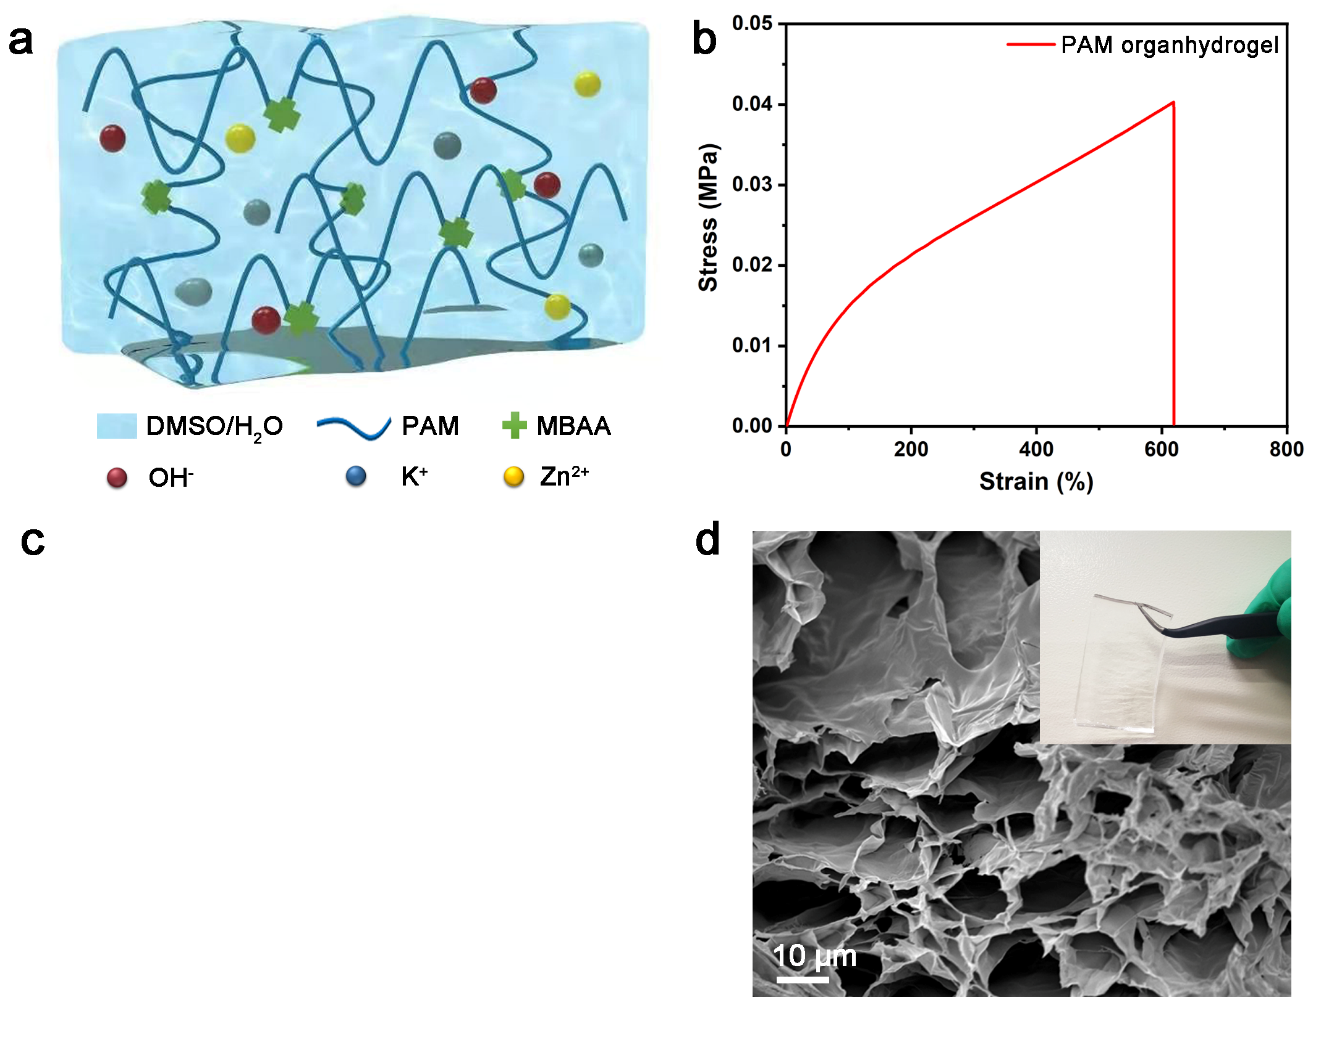


**Supplementary Figure 27.** (a) Schematic illustration of PAM organhydrogel electrolyte synthesized in binary solvent systems of DMSO/H2O. (b) Tensile stress-strain curve for PAM organhydrogel.


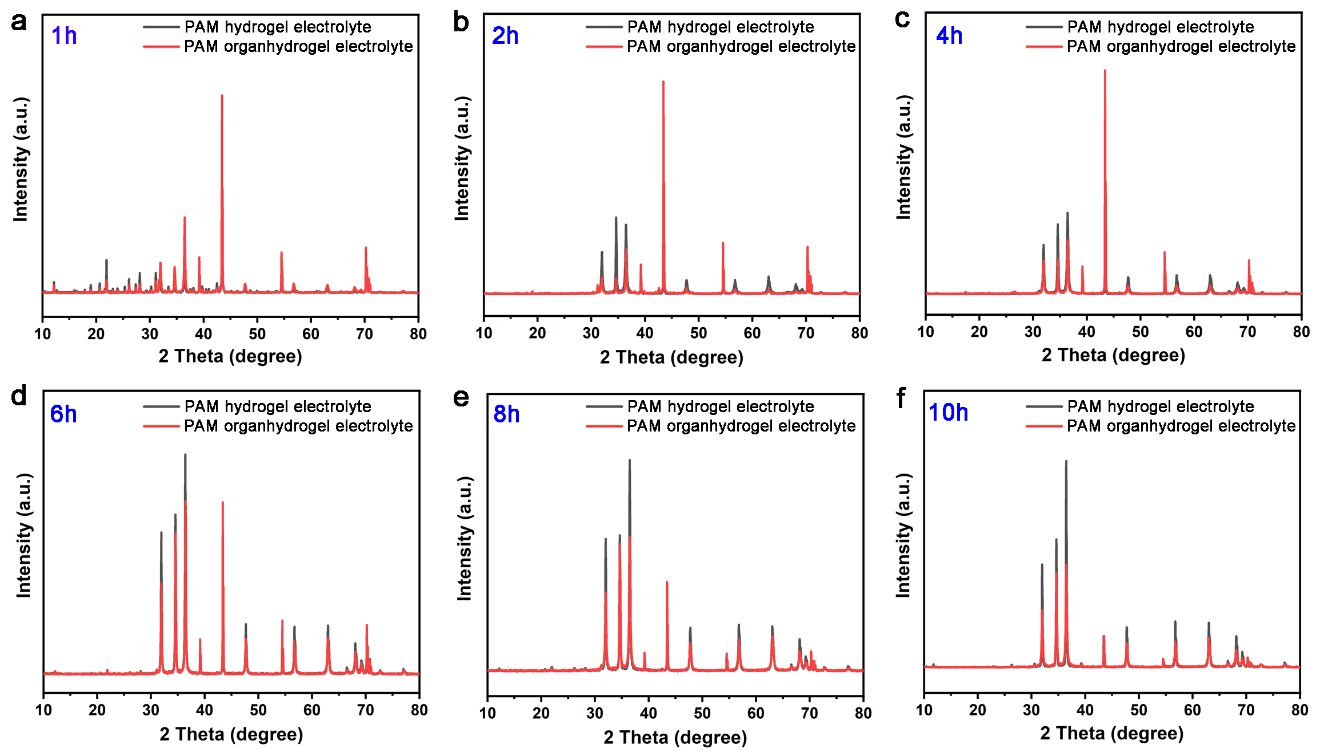


**Supplementary Figure 28.** Ex situ XRD patterns of Zn plates after cycling tests under the different charging-discharging time at 20 mA cm-2: (a) 1h; (b) 2h; (c) 4h; (d) 6h; (e) 8h and (f) 10h.


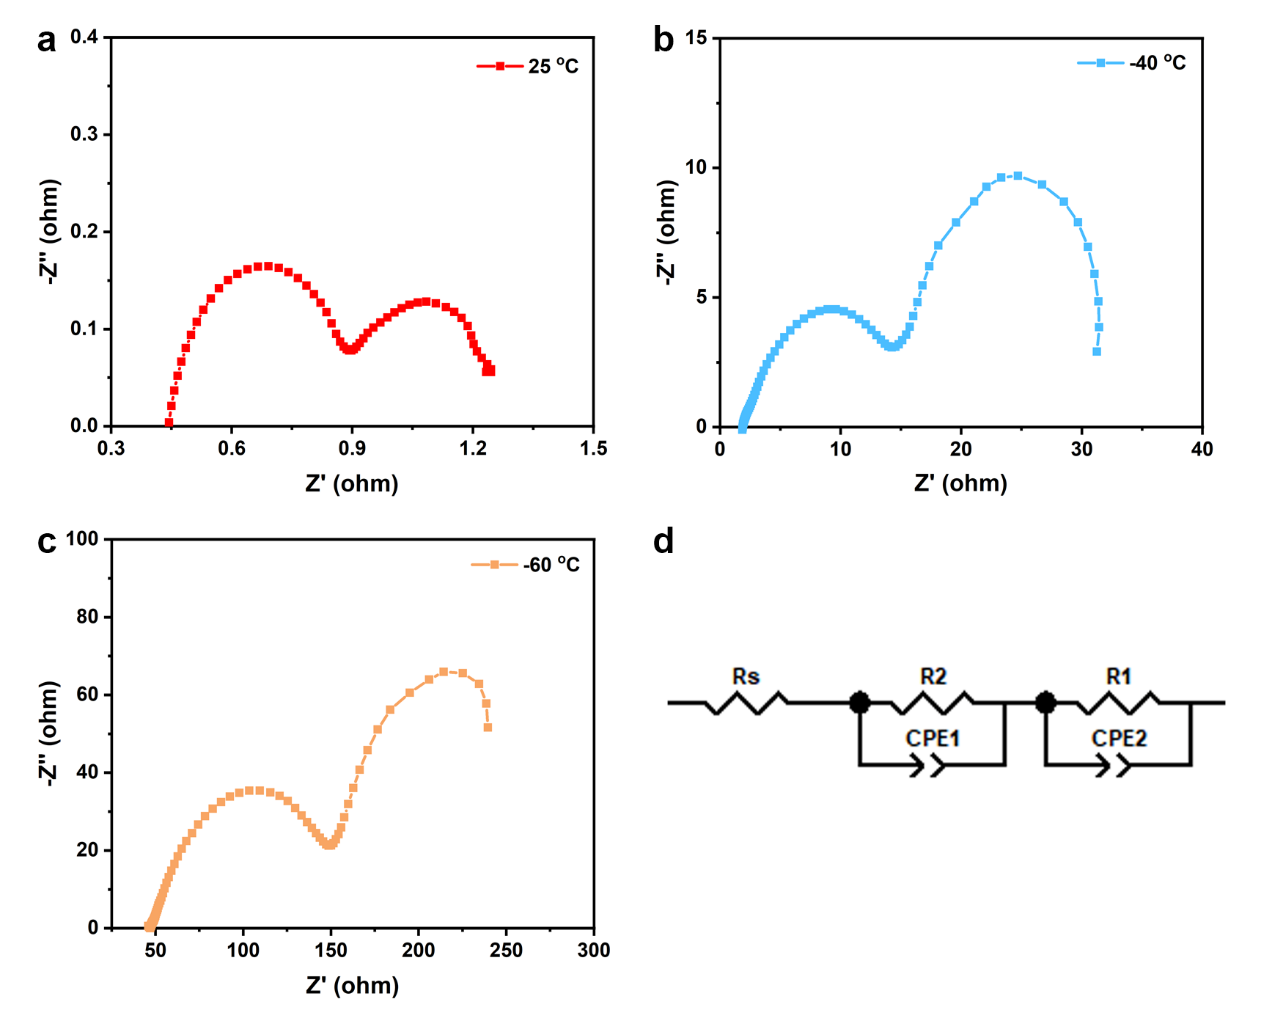


**Supplementary Figure 29.** EIS results of the quasi-solid-state ZABs with Co SA-NDGs measured at (a) 25oC, (b) -40oC and (c) -60oC. (d) Equivalent circuit diagram.


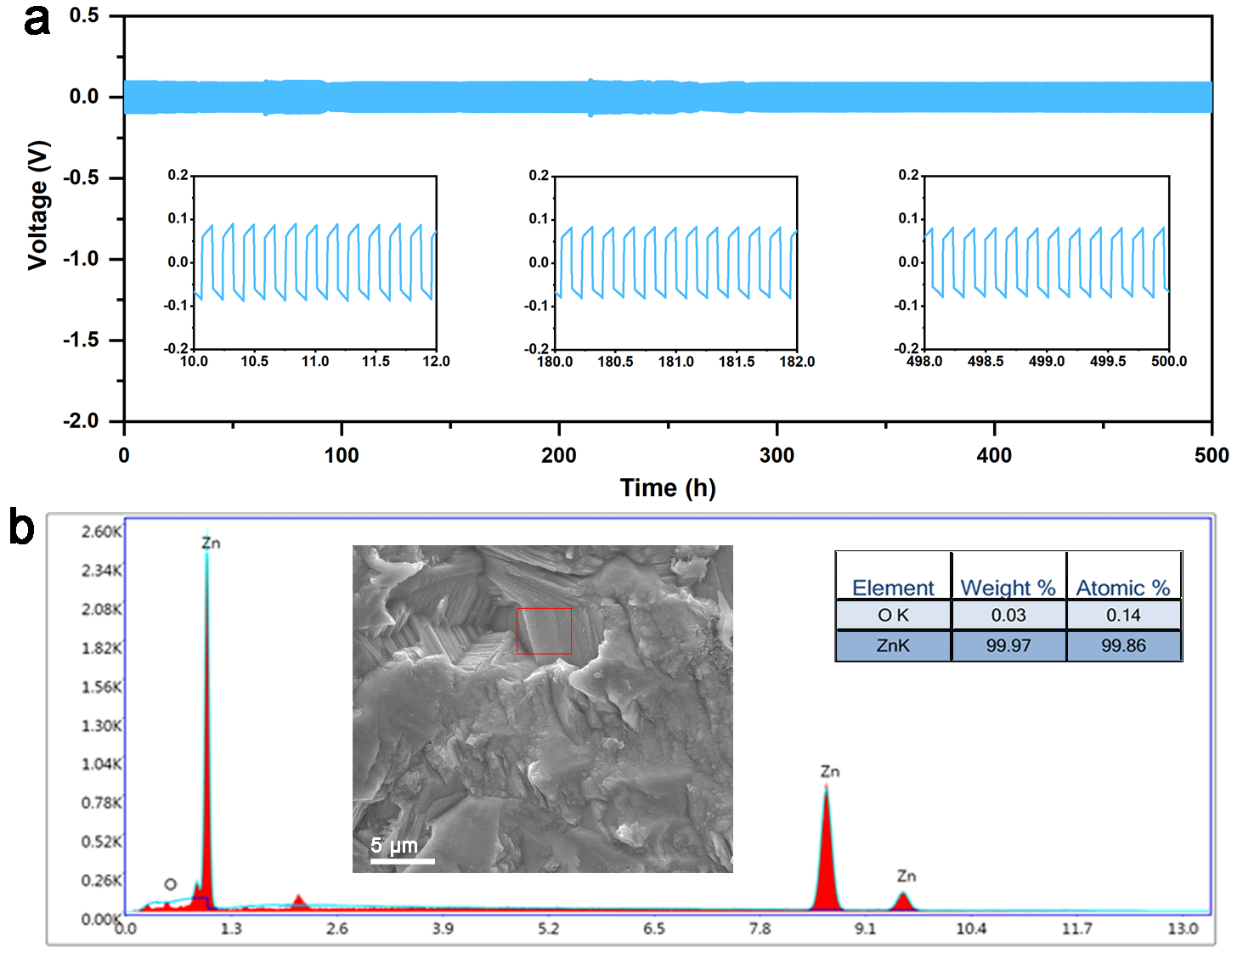


**Supplementary Figure 30.** (a) Cycling performance (@0.5 mA cm-2) of the symmetric Zn||Zn battery employing the PAM organhydrogel electrolyte at -60 oC. (b) EDS result of Zn plate after 500 h cycling test. Inset shows the corresponding SEM image.


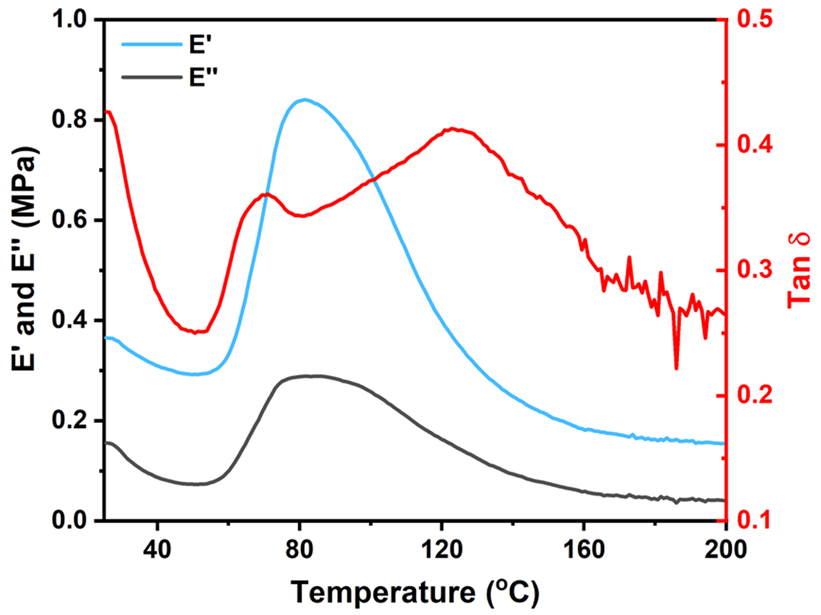


**Supplementary Figure 32**. DMA analysis of PAM organhydrogel under temperatures ranges from 25 to 200 oC.


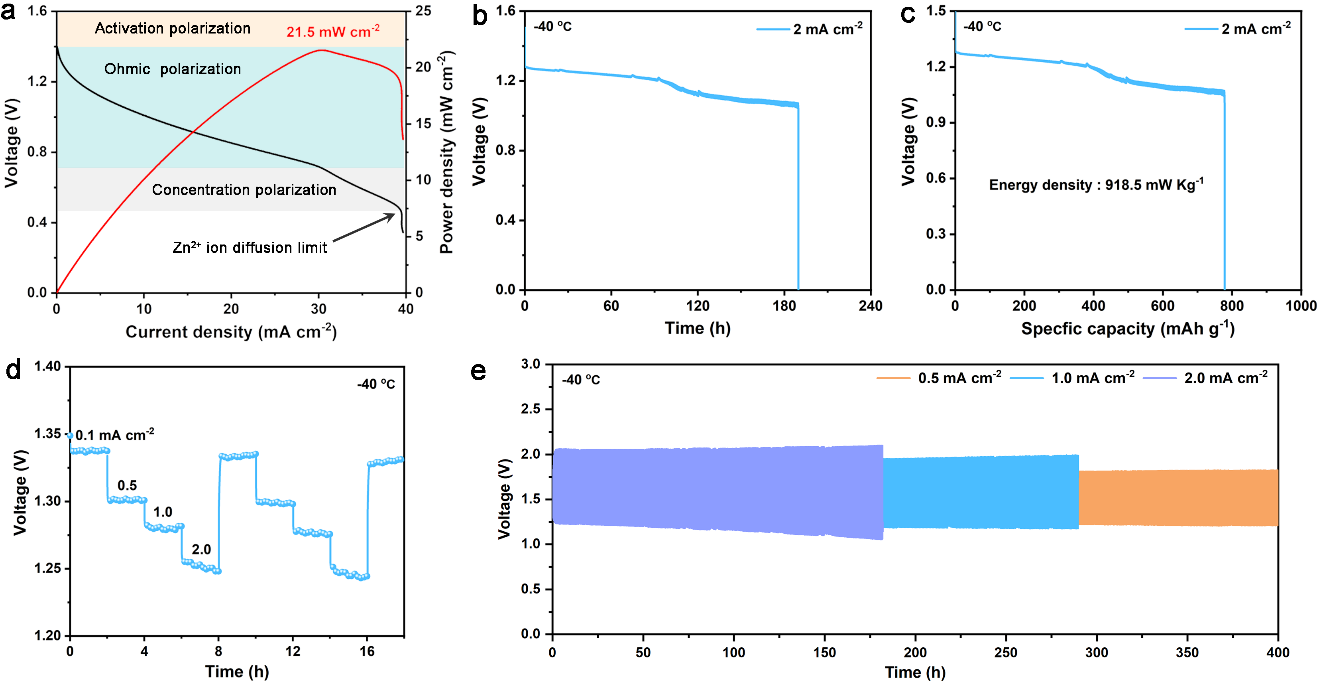


**Supplementary Figure 32**. (a) Galvanostatic discharge curves and the corresponding power density curves of the quasi-solid-state ZABs with Co SA-NDGs at -40 oC. (b) Galvanostatic discharge voltage platform and (c) specific capacity of the quasi-solid-state ZABs with Co SA-NDGs at 2 mA cm-2. (d) Rate performance of the Co SA-NDGs-based quasi-solid-state ZABs. (e) Charging/discharging cycling performance of quasi-solid-state ZABs with Co SA-NDGs at -40 oC.

As shown in Supplementary Fig. 32a, the dominant factor of discharge behavior changes from ohmic polarization to concentration polarization with the increase of voltage at -40 °C. The quasi-solid-state ZABs using Co SA-NDGs delivers a maximum power density of 21.9 mW cm-2. Therefore, a large voltage driving force is required in ultra-low-temperature environment to reach similar current density level measured in ambient condition. Supplementary Fig. 32d shows the rate performance of quasi-solid-state ZABs with Co SA-NDGs at -40 °C. After twice current density fluctuation tests, the discharging voltage hardly decays. The exceptional charging/discharging cycling performance with high-capacity retention over 90% are recorded at different current density in Supplementary Fig. 32e.


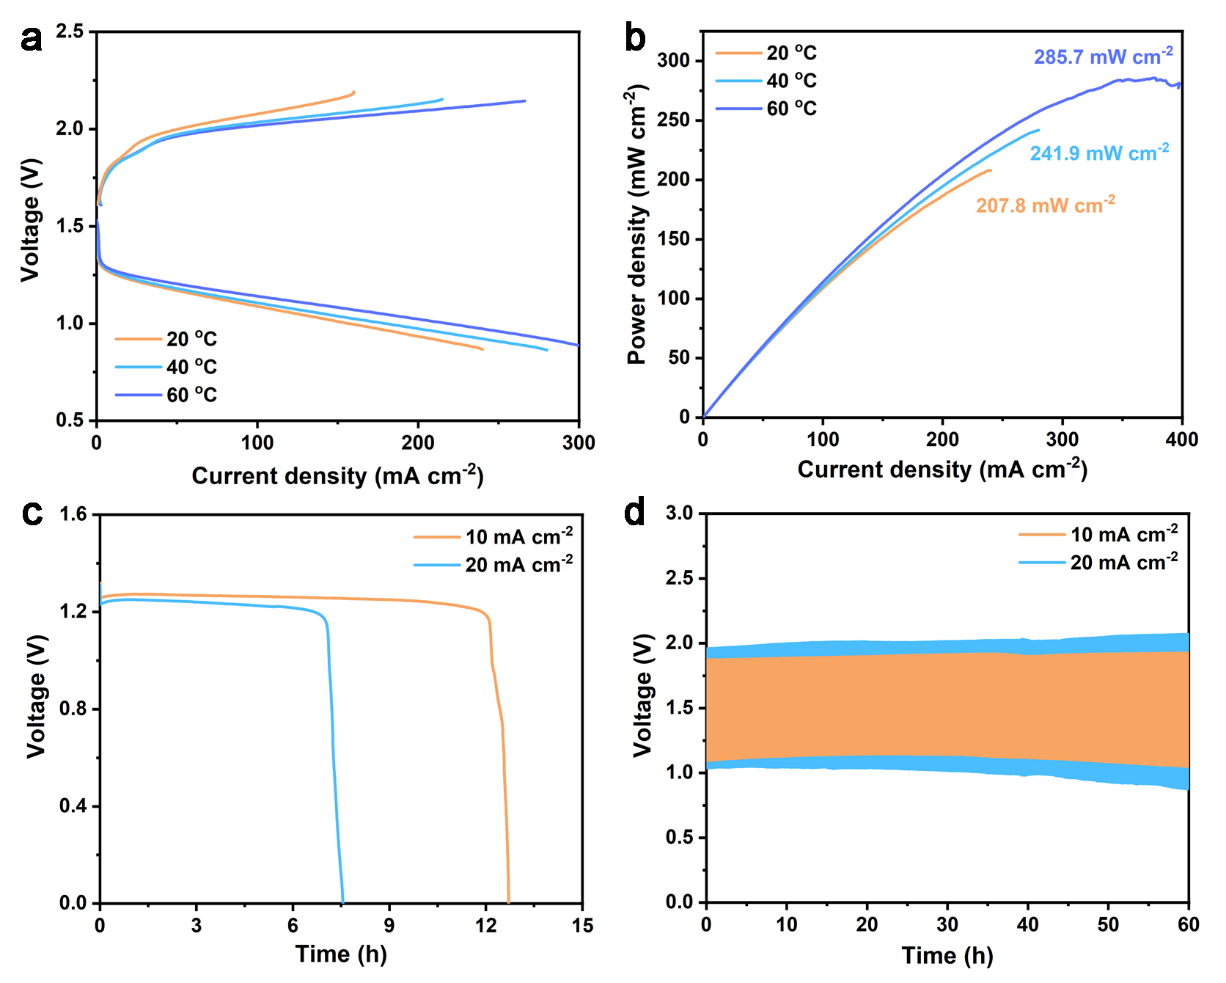


**Supplementary Figure 33**. (a) Charging/discharging curves and (b) power density curves of quasi-solid-state ZABs with Co SA-NDGs at different temperatures. (c) Galvanostatic discharge voltage platforms at 10 and 20 mA cm-2. (d) Charging/discharging cycling performance of quasi-solid-state ZABs with Co SA-NDGs measured at 60 oC.

**Supplementary Table S1.** EXAFS fitting parameters at the Co K-edge.

| Samples | Shell | N a | R (Å) b | σ2 (Å2·10-3) c | ΔE0 (eV) d | *R* factor (%) |
| --- | --- | --- | --- | --- | --- | --- |
| Co SA-NDGs | Co-N | 3.8 | 1.83 | 3.1 | -8.7 | 0.4 |
| Co-C | 1.6 | 2.53 | 9.9 | -9.7 |

*a* *N*: coordination numbers; *b* *R*: bond distance; *c* *σ*2: Debye-Waller factors; *d* Δ*E*0: the inner potential correction. *R* factor: goodness of fit.

**Supplementary Table 2.** Performance comparison of bifunctional oxygen catalysts.

| Catalysts | Eonset  (V) | E1/2  (V) | Ej=10 (V) | △E  (V) | Reference |
| --- | --- | --- | --- | --- | --- |
| Co SA-NDGs | 1.03 | 0.87 | 1.58 | 0.71 | *This work* |
| CNT@CoSA-Co/NCP | 1.00 | 0.87 | 1.61 | 0.74 | *Adv. Funct. Mater.*  **2021**, *31*, 2103360. |
| NGM-Co | 0.92 | 0.8 | 1.75 | 0.95 | *Adv. Mater.*  **2017**, *29*, 1703185. |
| H-Co@FeCo/N/C | 1.03 | 0.91 | 1.61 | 0.70 | *Appl. Catal. B: Environ.*  **2020**, *278*, 119259. |
| Fe/Ni-Nx/OC | 1.05 | 0.94 | 1.67 | 0.73 | *Adv. Mater.*  **2020**, *32*, 2004670. |
| Fe/N-G-SAC | 0.99 | 0.89 | 1.6 | 0.71 | *Adv. Mater.*  **2020**, *32*, 2004900. |
| Co-N4/NC | 0.93 | 0.81 | 1.60 | 0.79 | *Nano-Micro Lett.*  **2021**, *13*, 60. |
| FeNx-PNC | 0.997 | 0.85 | 1.63 | 0.78 | *ACS Nano*  **2018**, 12, 1949. |
| Fe-NC SAC | 1.02 | 0.88 | 1.68 | 0.80 | *J. Mater. Chem. A*  **2020**, *8*, 9981. |
| Co SA@NCF/CNF | 1.01 | 0.88 | 1.63 | 0.75 | *Adv. Mater.*  **2019**, *31*, 1808267. |
| Co-C3N4/CNT | 0.9 | 0.85 | 1.61 | 0.76 | *J. Am. Chem. Soc.*  **2017**, *139*, 3336. |
| S,N-Fe/N/C-CNT | 0.97 | 0.85 | 1.60 | 0.75 | *Angew. Chem. Int. Ed.*  **2017**, *56*, 610. |
| CoN4/NG | 0.98 | 0.87 | 1.61 | 0.74 | *Nano Energy*  **2018**, *50*, 691. |
| CoSA/N,S-HCS | 0.96 | 0.85 | 1.56 | 0.71 | *Adv. Energy Mater.*  **2020**, *10*, 2002896. |
| UNT Co SAs/N-C | 0.97 | 0.89 | 1.61 | 0.72 | *Nano Energy*  **2019**, *61*, 245. |
| SCoNC | 1.05 | 0.91 | 1.54 | 0.63 | *Adv. Energy Mater.*  **2019**, *9*, 1900149. |
| Co-N,B-CSs | 0.96 | 0.83 | 1.66 | 0.83 | *ACS Nano*  **2018**, *12*, 1894. |
| Co-POC | 0.94 | 0.83 | 1.70 | 0.87 | *Adv. Mater.*  **2019**, *31*, 1900592. |
| Co-SAs@NC | 0.96 | 0.82 |  |  | *Angew. Chem. Int. Ed.*  **2019**, *58*, 5359. |
| NC-Co SA | 1.0 | 0.87 | 1.59 | 0.72 | *ACS Catal.*  **2018**, *8*, 8961. |
| Fe-N4 SAs/NPC | 0.972 | 0.88 | 1.66 | 0.78 | *Angew. Chem. Int. Ed.*  **2018**, *57*, 8614. |
| Fe-N/P-C-700 | 0.94 | 0.87 | 1.66 | 0.79 | *J. Am. Chem. Soc.*  **2020**, *142*, 2404. |
| Fe-Nx-C | 1.08 | 0.91 | 1.83 | 0.92 | *Adv. Funct. Mater.*  **2019**, *29*, 1808872 |
| NCAC-Zn/Fe | 1.10 | 0.89 | 1.60 | 0.71 | *Research*  **2019**, *6813585*, 1. |
| FePc-GO | 0.99 | 0.89 | 1.65 | 0.76 | *ACS Nano*  **2020**,*14*, 13279. |
| MnSAC | 1.04 | 0.91 | 1.58 | 0.67 | *Nano Lett.*  **2020**, 20, 5443. |
| Ni-N4/GHSs/Fe-N4 | 0.93 | 0.83 | 1.62 | 0.79 | *Adv. Mater.*  **2020**, *32*, 2003134. |
| CoNi-SAs/NC | 0.88 | 0.76 | 1.57 | 0.81 | *Adv. Mater.*  **2019**, *31*, 1905622. |
| FeCo-Nx-CN | 0.95 | 0.89 | 1.67 | 0.78 | *Angew. Chem. Int. Ed.*  **2018**, *57*, 1856. |
| G@POF-Co | 0.87 | 0.81 | 1.66 | 0.85 | *Adv. Funct. Mater.*  **2019**, *29*, 1901301. |
| Fe3C-Co/NC | 0.94 | 0.88 | 1.60 | 0.72 | *Adv. Funct. Mater.*  **2019**, *29*, 1901949. |
| N-CoS2 YSSs | 0.95 | 0.81 | 1.51 | 0.79 | *Adv. Sci.*  **2020**, *7*, 2001178. |
| Co@hNCTs-800 | 0.99 | 0.87 | 1.63 | 0.76 | *Nano Energy*  **2020**, *71*, 104592. |
| CoFe/N-HCSs | 0.90 | 0.79 | 1.52 | 0.73 | *Chem. Eng. J*  **2021**, *407*, 127961. |
| FeCo/Co2P@NPCF | 0.85 | 0.79 | 1.56 | 0.77 | *Adv. Energy Mater.*  **2020**, *10*, 1903854. |
| MnO/Co/PGC | 0.95 | 0.78 | 1.54 | 0.82 | *Adv. Mater.*  **2019**, *31*, 1902339. |
| FeP/Fe2O3@NPCA | 0.98 | 0.78 | 1.57 | 0.79 | *Adv. Mater.*  **2020**, *32*, 2002292 |
| Pd/FeCo | 0.98 | 0.84 | 1.55 | 0.71 | *Adv. Energy Mater.*  **2020**, *11*, 2002204. |
| Co2FeO4/NCNTs | 0.94 | 0.8 | 1.65 | 0.85 | *Angew. Chem. Int. Ed.*  **2019**, *58*, 13291. |
| Co/N@CNTs@CNMF | 0.99 | 0.86 | 1.54 | 0.68 | *Adv. Funct. Mater.*  **2020**, *30*, 2003407. |
| Co-Co3O4@NAC | 0.94 | 0.8 | 1.61 | 0.81 | *Appl. Catal.B: Environ.*  **2020**, *260*, 118118. |
| Ni@N-HCGHF |  | 0.87 | 1.49 | 0.62 | *Adv. Mater.*  **2020**, *32*, 2003313. |
| f-FeCo-CNT | 0.96 | 0.87 | 1.71 | 0.85 | *Nano Res.*  **2020**, *13*, 1090. |
| CoFe20@CC | 1.02 | 0.86 | 1.52 | 0.66 | *Adv. Mater.*  **2019**, *31*, 1904689. |
| CoNC | 0.97 | 0.87 | 1.55 | 0.68 | *Chem. Eng. J*  **2021**, *404*, 121112. |
| Co3O4-x/NG | 0.96 | 0.84 | 1.53 | 0.66 | *Appl. Catal. B: Environ.*  **2020**, *278*, 119300. |
| FeCo@MNC | 0.96 | 0.86 | 1.47 | 0.61 | *Appl. Catal. B: Environ.*  **2019**, *244*, 150. |
| CoDNG900 | 0.94 | 0.86 | 1.61 | 0.75 | *Appl. Catal. B: Environ.*  **2021**, *281*, 119514. |
| ZOMC | 0.96 | 0.85 | 1.56 | 0.71 | *Adv. Mater.*  **2020**, *32*, 2002170. |
| N-NiSe2/CC | 0.80 | 0.73 | 1.5 | 0.76 | *Chem. Eng. J*  **2020**, *401*, 126088. |
| CoNi/BCF | 0.91 | 0.80 | 1.60 | 0.80 | *Appl. Catal. B: Environ.*  **2019**, *240*, 193. |
| ZIF@HMCS | 0.92 | 0.82 | 1.63 | 0.81 | *Nat. Sci. Rev.*  **2020**, *7*, 609. |
| f-FeCo-CNT | 0.96 | 0.87 | 1.71 | 0.84 | *Nano Res.*  **2020**, *13*, 1090. |
| Co3O4-Co@NC | 0.97 | 0.86 | 1.58 | 0.72 | *Nano Res.*  **2021**, *14*, 2353. |
| CuCo2O4@C | 0.95 | 0.85 | 1.56 | 0.71 | *Nano Lett.*  **2017**, *17*, 7989. |
| GNCNTs | 0.92 | 0.85 | 1.60 | 0.75 | *Adv. Funct. Mater.*  **2019**, *30*, 1906081. |
| C-MOF-C2-900 | 0.94 | 0.82 | 1.58 | 0.76 | *Adv. Mater.*  **2018**, *30*, 1705431. |
| Fe0.5Ni0.5@N-GR | 0.94 | 0.83 | 1.43 | 0.70 | *Adv. Funct. Mater.*  **2018**, *28*, 1706928. |
| CMO/S | 0.92 | 0.76 | 1.7 | 0.94 | *Adv. Energy Mater.*  **2018**, *8*, 1800612. |
| CNF@Zn/CoNC | 0.91 | 0.82 | 1.7 | 0.88 | *Small*  **2018**, *14*, 1704207. |
| CoSx/Co-NC-800 | 0.95 | 0.80 | 1.54 | 0.74 | *Adv. Funct. Mater.*  **2019**, *29*, 1904481. |

**Supplementary Table 3.** The performance comparison of reported aqueous ZABs.

| Catalysts | OCV  (V) | Peak Power density (mW cm-2) | Specific capacity (mAh g-1) | Cycling stability  (h) | Reference |
| --- | --- | --- | --- | --- | --- |
| Co SA-NDGs | 1.53 | 251.4 | 757.4 | 300 | *This work* |
| CNT@SAC-Co/NCP | 1.45 | 172 |  | 33 | *Adv. Funct. Mater.* **2021**, **2021**, *31*, 2103360. |
| Fe/Ni-Nx/OC | 1.52 | 148 | 712 | 315 | *Adv. Mater.*  **2020**, *32*, 2004670. |
| PFN | 1.45 | 175 | 816 | 500 | *J. Am. Chem. Soc.*  **2021**, *143*, 11595. |
| Fe-NC SAC |  | 180 | 786 | 53 | *J. Mater. Chem. A*  **2020**, *8*, 9981. |
| Co-N,B-CSs | 1.4 | 100.4 |  | 14 | *ACS Nano*  **2018**, *12*, 1894. |
| FeAC@FeSA-N-C | 1.41 | 115 |  |  | *ACS Nano*  **2019**, *13*, 11853. |
| Cu ISAS/NC |  | 280 | 736 | 50 | *Nat. Commun.*  **2019**, *10*, 3734. |
| MnSAC |  | 258 | 675 |  | *Nano Lett.*  **2020**, 20, 5443. |
| Co-N4/NC | 1.36 | 101.6 | 762.8 | 16.7 | *Nano-Micro Lett.*  **2021**, *13*, 60. |
| Fe/N-G-SAC |  | 120 |  | 240 | *Adv. Mater.*  **2020**, *32*, 2004900. |
| Co SANC-850 | 1.48 |  | 860.95 | 44 | *J. Mater. Chem. A*  **2020**, *8*, 2131. |
| Cu-SA/SNC |  | 220 |  |  | *Energy Environ. Sci.*  **2019**, *12*, 3508. |
| Fe SAs/N-C |  | 225 |  | 260 | *ACS Catal.*  **2019**, *9*, 2158. |
| Co2FeO4/NCNTs | 1.43 | 90.1 |  | 100 | *Angew. Chem. Int. Ed.*  **2019**, *58*, 13291. |
| (Mg,Co)3O4@NGC | 1.45 | 125 |  | 200 | *ACS Energy Lett.*  **2017**, *2*, 2706. |
| NCAC-Zn/Fe | 1.50 | 231 | 780 | 122 | *Research*  **2019**, *6813585*, 1-13. |
| Fe-SAs/NP-C | 1.45 | 195 |  |  | *Nat. Commun.*  **2018**, *9*, 5422. |
| S,N-Fe/N/C-CNT | 1.35 | 102.7 |  | 33 | *Angew. Chem. Int. Ed.*  **2017**, *56*, 610. |
| Mo SACs/N-C | 1.47 | 78 | 750 | 120 | *Nano Energy*  **2020**, *67*, 104288. |
| Fe,Mn,N-FGC | 1.41 | 220 |  | 12.8 | *Inorg. Chem.*  **2020**, *59*, 5194. |
| N-CoS2 YSSs | 1.41 | 81 | 744 | 165 | *Adv. Sci.*  **2020**, *7*, 2001178. |
| Fe/N-CNRs |  | 181.8 | 771.77 |  | *Adv. Funct. Mater.*  **2020**, *31*, *2008085.* |
| Co-POC |  | 78 |  | 79 | *Adv. Mater.*  **2019**, *31*, 1900592. |
| SilkNC/KB | 1.43 | 91.2 | 614.7 | 33 | *Chem. Mater.*  **2019**, *31*, 1023. |
| Co-SAs@NC | 1.46 | 105.3 | 897.1 |  | *Angew. Chem. Int. Ed.* **2019**, *58*, 5359. |
| CoNi/BCF | 1.44 | 155.1 | 710.9 | 30 | *Appl. Catal. B: Environ.*  **2019**, *240*, 193. |
| CoN4/NG | 1.51 | 115 | 730 | 100 | *Nano Energy*  **2018**, *50*, 691. |
| CoSA/N,S-HCS | 1.50 | 173.1 | 781 | 333 | *Adv. Energy Mater.*  **2020**, *10*, 2002896. |
| CuSA@HNCNx | 1.51 | 212 | 806 | 300 | *Appl. Catal. B: Environ.*  **2020**, *268*, 118746. |
| N-Co3O4@NC | 1.344 | 174.1 |  | 50 | *Adv. Funct. Mater.*  **2019**, *29*, 1902875. |
| Cu1/NC-900 | 1.48 | 223 |  | 100 | *Nano Res.*  **2021**, *14*, 998. |
| Fe-Zn-SA/NC |  | 167.2 | 756.6 | 120 | *Nano Res.*  **2021**, *14*, 1374. |
| f-FeCo-CNT | 1.484 | 195.8 | 754 | 180 | *Nano Res.*  **2020**, *13*, 1090. |
| Co-Co3O4@NAC | 1.45 | 164 | 721 | 35 | *Appl. Catal. B: Environ.*  **2020**, *260*, 118118. |
| (Co,Fe)3N_R |  | 234 |  | 300 | *Nat. Commun.*  **2020**, *11*, 1952. |
| Fe-Nx-C | 1.51 | 96.4 | 641 |  | *Adv. Funct. Mater.*  **2019**, *29*, 1808872. |
| Fe-N/P-C-700 | 1.42 | 133.2 | 723.6 | 40 | *J. Am. Chem. Soc.*  **2020**, *142*, 2404. |
| *pf*SAC-Fe | 1.41 | 123.4 | 732 |  | *Sci. Adv.*  **2019**, *5*, eaaw2322. |
| FeCo-IA/NC |  |  |  |  | *J. Mater. Chem. A*  **2020**, *8*, 4369. |
| SCoNC | 1.49 | 194 |  | 20 | *Adv. Energy Mater.*  **2019**, *9*, 1900149. |
| A-Co@CMK-3-D |  | 162 | 765 | 45 | *Small Methods*  **2019**, *3*, 1800450. |
| CoFe20@CC | 1.50 | 190.3 | 787.0 | 132 | *Adv. Mater.*  **2019**, *31*, 1904689. |
| Mn-SAS/CN |  | 220 |  |  | *Adv. Energy Mater.* **2021**, *11*, 2002753. |
| AlNiCoRuMo | 1.48 | 146.5 |  | 500 | *ACS Materials Lett.*  **2020**, *2*, 1698. |
| Co3O4-x/NG | 1.49 | 166 | 700.6 | 62 | *Appl. Catal. B: Environ.*  **2020**, *278*, 119300. |
| H-Co@FeCo/N/C | 1.45 | 125.2 |  | 200 | *Appl. Catal. B: Environ.*  **2020**, *278*, 119259. |
| Co3O4-Co@NC |  | 158 | 758 | 200 | *Nano Res.*  **2021**, *14*, 2353. |
| FePc@N,P-DC | 1.45 | 120 | 585 | 50 | *Appl. Catal. B: Environ.*  **2020**, *265*, 118198. |
| NPSC-Co2Fe1 | 1.44 | 174.6 |  | 70 | *Appl. Catal. B: Environ.*  **2020**, *260*, 118594. |
| CoFe@NC-AS | 1.58 | 102 |  | 48 | *J. Power Sources*  **2020**, *455*, 227975. |
| NPMC/CoFe | 1.49 | 146.3 |  | 75 | *J. Power Sources*  **2019**, *441*, 227177. |
| ZIF/HMCS | 1.38 | 120.2 |  | 80 | *Nat. Sci. Rev.*  **2020**, *7*, 609. |
| CoFe/N-HCSs | 1.39 | 96.5 | 774.5 |  | *Chem. Eng. J*  **2021**, *407*, 127961. |
| PdMo bimetallene | 1.48 | 154.2 | 798 | 500 | *Nature*  **2019**, *574*, 81. |
| SA-PtCoF |  | 125 | 808 | 240 | *Energy Environ. Sci.*  **2020**, *13*, 884. |
| FeP/Fe2O3 @NPCA |  | 130 | 717 | 200 | *Adv. Mater.*  **2020**, *32*, 2002292. |
| ZOMC | 1.49 | 221.1 | 697.9 | 165 | *Adv. Mater.*  **2020**, *32*, 2002170. |
| Co/N@CNTs@  CNMF | 1.52 | 133 |  | 190 | *Adv. Funct. Mater.*  **2020**, *30*, 2003407. |
| N-NiSe2/CC |  |  |  |  | *Chem. Eng. J*  **2020**, *401*, 126088. |
| CoOx/NMC | 1.48 | 195.3 |  | 400 | *Energy Storage Mater.*  **2020**, *29*, 156. |
| CoFe@N-GCNCs | 1.45 | 132.5 |  | 100 | *J. Power Sources*  **2020**, *480*, 229107. |
| FeCo/Co2P@  NPCF | 1.44 | 154 |  | 107 | *Adv. Energy Mater.*  **2020**, *10*, 1903854. |
| Ni|MnO/CNF | 1.56 | 138.6 |  | 120 | *Adv. Funct. Mater.*  **2020**, *30*, 1910568. |
| CoFe/N-GCT | 1.43 | 203 |  | 267 | *Angew. Chem. Int. Ed.*  **2018**, *57*, 16166. |
| Mo-N/C@MoS2 | 1.46 | 196.4 |  | 48 | *Adv. Funct. Mater.*  **2017**, *27*, 1702300. |
| f-FeCo-CNT | 1.484 | 195.8 | 754 | 180 | *Nano Res.*  **2020**, *13*, 1090-1099. |
| Co-NC-800 | 1.44 | 109.5 | 657.2 | 36 | *Chem. Eng. J*  **2021**, *404*, 121112. |
| CoDNG900 | 1.45 | 207 | 669 | 666 | *Appl. Catal. B: Environ.*  **2021**, *281*, 119514. |
| FeCo@MNC | 1.41 | 115 |  | 24 | *Appl. Catal. B: Environ.*  **2019**, *244*, 150. |
| Ni0.2Co0.8Se | 1.44 | 223.5 | 698.6 | 50 | *Nano-Micro Lett.*  **2019**, *11*, 28. |
| Meso-CoNC@GF | 1.51 | 154.4 |  | 105 | *Adv. Mater.*  **2017**, *30*, 1704898. |
| Fe0.5Ni0.5@N-GR | 1.48 | 85 | 765 | 40 | *Adv. Funct. Mater.*  **2018**, *28*, 1706928. |
| C-MOF-C2-900 | 1.46 | 105 | 741 | 120 | *Adv. Mater.*  **2018**, *30*, 1705431. |
| CNF@Zn/CoNC | 1.46 | 140.1 | 680.2 | 150 | *Small*  **2018**, *14*, 1704207. |
| CoSx/Co-NC-800 | 1.40 | 103 | 770.4 | 200 | *Adv. Funct. Mater.*  **2019**, *29*, 1904481. |
| N, S-CC | 1.36 | 42 |  |  | *Adv. Sci.*  **2018**, *5*, 1800760. |
| o-CC-H2 |  | 91.4 | 707 | 30 | *Energy Storage Mater.*  **2018**, *15*, 124. |
| CNT@POF |  | 237 | 772.7 | 67 | *Energy Environ. Sci.*  **2018**, *11*, 1723. |
| N-GQDs/NiCo2S4/  CC |  | 75.2 |  | 200 | *Small*  **2019**, *15*, 1903610. |
| NGM-Co |  | 152 | 750 | 60 | *Adv. Mater.*  **2017**, *29*, 1703185. |
| Co-N-CNT | 1.37 | 101 |  | 15 | *Adv. Funct. Mater.*  **2017**, *28*, 1705048. |

**Supplementary Table 4.** Performance comparison of reported quasi-solid-state ZABs.

| Catalysts | Gel electrolyte | OCV  (V) | Peak Power density (mW  cm-2) | Cycling time (h)  @current density (mA cm-2) | Reference |
| --- | --- | --- | --- | --- | --- |
| Co SA-NDGs | PAM | 1,43 | 219.9 | 50@100  100@50 | This work |
| Co SA@NCF/CNF | PVA | 1.41 |  | 9@3 | *Adv. Mater.*  **2019**, *31*, 1808267. |
| NiCo2.148O4 PNS | PVA | 1.30 |  | 20@1 | *Adv. Mater.*  **2020**, *32*, 2001651. |
| Ce-LaCoO3 | PVA | 1.33 | 31 | 8@2 | *Nano Energy*  **2020**, *50*, 691. |
| CoN4/NG | PVA |  | 28 | 6@3 | *Nano Energy*  **2018**, *50*, 691. |
| C-Co SA | PAA | 1.41 | 20.9 | 41@ | *ACS Catal.*  **2018**, *8*, 8961. |
| CoSA/N,S-HCS | PVA | 1.48 |  | 17@5 | *Adv. Energy Mater.*  **2020**, *10*, 2002896. |
| Fe-NC SAC | PVA | 1.424 | 45 | 1@2 | *J. Mater. Chem. A*  **2020**, *8*, 9981. |
| Mn-CoN | PAAm | 1.37 | 48 | 20@2 | *Sci. China Chem.*  **2020**, *63*, 7. |
| Mn3O4/NiCo2S4 | PVA-PEO | 1.427 |  | 16.8@1 | *J. Power Sources*  **2020**, *462*, 228162. |
| NiCo2O4/MXene | PVA | 1.40 | 55.1 | 33@1 | *ACS Appl. Mater. Interfaces* **2020**, *12*, 44639. |
| NPF@CNF-800 | PVA | 1.33 | 64 | 20@5 | *ACS Appl. Mater. Interfaces*  **2021**, 13, 13328. |
| CoS/CoO@NGNs | PVA | 1.3 | 39.3 | 10@1 | *Nano-Micro Lett.*  **2021**, *13*, 3. |
| NCNTM | PAAs | 1.49 | 176 | 30@1 | *J. Energy Chem.*  **2021**, *55*, 183. |
| FeCo/Se-CNT | PVA | 1.41 | 37.5 | 20@5 | *Nano Lett.*,  **2021**, *21*, 2255. |
| CoFe/N-HCSs | PVA | 1.4 |  | 10@2 | *Chem. Eng. J*  **2021**, *407*, 127961. |
| N-Mo-holey G | PANa | 1.37 | 83 | 88@2 | *Appl. Catal.B: Environ.*  **2020**, *276*, 119172. |
| AlFeCoNiCr | PANa | 1.38 | 100 | 60@2 | *Appl. Catal. B: Environ.* **2020**, *268*, 118431. |
| FePc@N,P-DC | PVA | 1.33 |  | 8@2 | *Appl. Catal. B: Environ.*  **2020**, *260*, 118198. |
| S-Ni3FeN/NSG | PAAs | 1.38 | 140.1 | 35@1 | *Appl. Catal. B: Environ.*  **2020**, *274*, 119086. |
| Fe0.5Ni0.5@N-GR | PVA | 1.352 |  | 18@10 | *Adv. Funct. Mater.*  **2018**, *28*, 1706928. |
| N-NiSe2/CC | PVA |  | 27 | 30@1 | *Chem. Eng. J*  **2020**, *401*, 126088. |
| FeP/Fe2O3@NPCA | PVA | 1.42 | 40.8 | 8@5 | *Adv. Mater.*  **2020**, *32*, 2002292. |
| FeCo/Co2P@NPCF | PVA | 1.26 |  | 15@2 | *Adv. Energy Mater.*  **2020**, *10*, 1903854. |
| Co3O4@x HoNPs@HPNCS | PVA | 1.459 | 94.1 | 18@3 | *Angew. Chem. Int. Ed.*  **2019**, *58*, 13840. |
| GNCNTs | PAA | 1.54 | 223 | 24@1 | *Adv. Funct. Mater.*  **2019**, *30*, 1906081. |
| Co-NC@Al2O3 | PAM | 1.41 | 72.4 | 10@20 | *Adv. Mater.*  **2018**, *30*, 1805268. |
| N-GQDs/  NiCo2S4/CC | PVA | 1.406 | 26.2 | 12@20 | *Small*  **2019**, *15*, 1903610. |
| Meso-CoNC@GF | PVA | 1.40 | 85.6 | 12@20 | *Adv. Mater.*  **2017**, *30*, 1704898. |
| NC-Co3O4-90 | PAM | 1.44 | 82 | 21@5 | *Adv. Mater.*  **2017**, *29*, 1704117. |
| N, S-CC | PVA-PEO | 1.247 | 47 | 8@5 | *Adv. Sci.*  **2018**, *5*, 1800760. |
| CNT@POF | PVA | 1.39 | 22.3 | 4@1 | *Energy Environ. Sci.*  **2018**, *11*, 1723. |
| Co3O4/CC | PVA-SiO2 | 1.27 | 62.6 | 48@3 | *Nano Energy*  **2019**, *56*, 454. |
| CMO/S | PVA-PEO | 1.32 |  | 10@1 | *Adv. Energy Mater.*  **2018**, *8*, 1800612. |
| NGM-Co | PVA | 1.439 | 28 | 1@1 | *Adv. Mater.*  **2017**, *29*, 1703185. |
| NP-Co3O4/CC | PVA | 1.349 | 99.8 | 20@5 | *Energy Storage Mater.*  **2020**, *26* , 157. |
| Ni0.2Co0.8Se | PVA | 1.428 | 41 | 8@2 | *Nano-Micro Lett.*  **2019**, *11*, 28. |
| Co3O4/N-CNT | PVA | 1.31 |  | 20@2 | *Small*  **2017**, *13*, 1700518. |
| SilkNC/KB | PVA |  | 32.3 | 10@1 | *Chem. Mater.*  **2019**, *31*, 1023. |
| Co/ZnCo2O4@NC-CNTs | PVA | 1.30 | 151 | 21@5 | *Nano Energy*  **2021**, *82*, 105710. |
| D-CMO | PANa | 1.46 | 149 | 34@2 | *Nano Energy*  **2021**, *85*, 106020. |
| Co3O4/Mn3O4/CNx@CNFs | PVA | 1.51 | 191 | 9@1 | *Electrochimica Acta*  **2020**, *344*, 136145. |
| HCA-Co | PAA | 1.40 | 44.8 | 40@1 | *Chem. Eng. J.*  **2019**, *369*, 988. |
| CoNC | PAAS | 1.33 | 117 | 21@2 | *Chem. Eng. J.*  **2021**, *404*, 127112. |
| Fe-N-C-700 | PAA | 1.42 | 70 |  | *Chem. Eng. J.*  **2021**, *405*, 125956. |
| NiFe@N-CFs | PVA | 1.18 |  | 10@1  mA cm-2 | *J. Mater. Chem. A*  **2020**, *8*, 13725. |
| Co-Fe-S@NSRPC | PAM-PAA | 1.42 | 78 | 50@5 | *Nanoscale*  **2020**, *12*, 11746. |
| Mn3O4/NiCo2S4 | PVA/PEO | 1.43 |  | 16.8@1 | [*J. Power Sources*](https://www.sciencedirect.com/science/journal/03787753)  [**2020**, *462*](https://www.sciencedirect.com/science/journal/03787753/462/supp/C), 228162. |
| Co/Co-N-C | PVA | 1.41 |  | 10@2 | *Adv. Mater.*  **2019**, *31*, 1901666. |
| Co-NCNT | PANa | 1.45 | 144.6 | 75@2 | [*Energy Storage Mater.*](https://www.sciencedirect.com/science/journal/24058297) [**2019**, *20*](https://www.sciencedirect.com/science/journal/24058297/20/supp/C), 234. |
| Co-Nx-YSC-600 | PVA | 1.35 | 55.3 | 4@5 | *Nano Energy* 2021, *89*, 106314. |
| WN-Ni@N,P-CNT | PVA | 1.57 | 100.4 | 10@1 | *Appl. Catal. B: Environ.*2021, *298*, 120511. |
| Fe1Co1-CNF | PVA |  |  | 3@2 | *Nano Energy* 2021, *87*, 106147. |
| Co/CoO@NSC | PANa | 1.43 | 82.7 | 143@2 | *J. Energy Chem.*2022, *64*, 385. |
| NiFe/N-CNT | PVA | 1.41 | 105.4 | 10@1 | *Nano Energy* 2020, *68*, 104293. |
| OCNT | PAA | 1.39 | 103 | 17@5 | *Energy Storage Mater.* 2020, *30*, 138. |
| FeCo/N-CNTs@CC | PVA | 1.40 | 127 | 8@20 | *ACS Sustainable Chem. Eng.* 2021, *9*, 4498. |
| FeS2-CoS2/NCFs | PVA | 1.39 | 69 | 20@1 | *J. Power Sources* 2021, 482, 228955. |
| CoNC-MOG | PVA | 1.41 | 63 | 12@2 | *Appl. Surface Sci.*2021, *537*, 147818. |
| NBSCF | CNF-based membranes | 1.44 |  | 15@1 | *J. Mater. Chem. A* 2019, *7*, 24231. |
| CoFe@NCNT/  CFC | PVA | 1.43 | 37.7 | 15@1 | *J. Mater. Chem. A*2020, *8*, 18162. |
| Ni5.7Ru0.3 | PVA | 1.33 | 98.3 | 68@2 | *Chem. Commun.*2020, *56*, 13615. |
| NC-Co/CoNx | PAA | 1.40 | 41.5 | 25@1 | *Energy Storage Mater.*2019, *16*, 243. |
| NO-G@CP | PVA | 1.33 | 65.1 | 6@5 | *J. Mater. Chem. A*2020, *8*, 11202. |
| CoO-NSC | PAA |  | 65 | 35@1 | *ACS Appl. Mater. Interfaces* 2019, *11*, 16720. |
| P-O/FeN4-CNS | PVA | 1.41 | 109 | 20@10 | *ACS Appl. Mater. Interfaces* 2019, *11*, 33054. |
| CoFe/FeNC | PAA | 1.47 | 108.6 | 18@2 | *ACS Sustainable Chem. Eng.* 2020, *8*, 9009. |
| FeCo-N-C-700 | PVA | 1.43 |  | 62@10 | *J. Mater. Chem. A*2020, *8*, 9355. |
| FeNx/N,S-C | PANa |  | 70.6 | 52@5 | *Carbon*2020, *166*, 64. |
| Fe-NC SAC | PVA | 1.42 | 45 | 1@1 | *J. Mater. Chem. A*2020, *8*, 9981. |
| N-CuCoS1.97 NWs | PVA | 1.36 |  | 8@1 | *J. Energy Chem.*2019, *34*, 1. |
| CoFeP@C | PVA |  | 72.6 | 20@1 | *ACS Appl. Mater. Interfaces* 2021, *13*, 22282. |
| CoIn2Se4 | PVA | 1.37 | 107 | 68@10 | *ACS Appl. Mater. Interfaces* 2020, *12*, 8115. |
| V-Co3O4 | PVA | 1.39 | 40.6 | 32@7 | *ACS Catal.* 2021, *11*, 8097. |
| N-doped NiCo2O4 | PVA |  | 23 | 53@5 | *ACS Appl. Energy Mater.* 2019, *2*, 2296. |
| h-FeCo alloy/NCNFs | PAA | 1.34 | 12.6 | 19@1 | *Sustainable Energy Fuels* 2020, *4*, 1747 |
| BFC-FC-0.2 | PAA | 1.49 | 160 | 110@2 | *Angew. Chem. Int. Ed.*2020, *59*, 4793. |
| FeNi SAs/NC | PAA | 1.45 | 42.2 | 9@3 | *Adv. Energy Mater.*2021, *11*, 2101242. |
| Fe/Fe3C@  NdC-NCs | P-(AM-co-AA) | 1.43 | 60 | 40@5 | *J. Mater. Chem. A*2019, *7*, 17581 |
| FeCu-N-HC- | PVA | 1.41 | 113 | 110@10 | *Adv. Funct. Mater.*2020, *31*, 2006533. |
| Fe-N-C | PANa-cellulose | 1.48 | 108.6 | 110@5 | *Adv. Energy Mater.*2019, *9*, 1803046. |
| CoNCNTF/CNFs | PVA | 1.30 | 63 | 11@0.5 | *Carbon*2019, *142*, 379e387 |
| NiS2/CoS2 | PVA |  | 101 | 33@10 | *J. Power Sources*2019, *437*, 226893. |
| Pt/RuO2/CF | PAM-CNF/KOH/KI | 1.45 | 65 | 75@2 | [*Energy Storage Mater.*](https://www.sciencedirect.com/science/journal/24058297) [**2021**, *42*](https://www.sciencedirect.com/science/journal/24058297/42/supp/C), 88. |
| Co3O4/CC | KI-PVAA-GO GPE |  | 78.6 | 200@2 | *Adv. Mater.*2020, *32*, 1908127. |
| Ni-Co9S8/rGN | PAA | 1.37 | 110 | 25@1 | *Appl. Catal. B: Environ.*2021, *298*, 120539. |
| NiCo2O4@N-CNWs | PVA-PEO | 1.28 |  | 45@1 | *Electrochim. Acta*2019, *319*, 1e9. |
| CoSe2-NCNT NSA | PAA | 1.37 | 51.1 | 5@2 | *Nanoscale* 2021,*13*, 3019. |
| P-CoSe2/N-C FAs | PAA | 1.30 |  | 20@1 | *Adv. Funct. Mater.*2018, *28*, 1804846. |
| PdNi/Ni@N-C | PAA | 1.40 | 66.5 | 15@1 | *Energy Storage Mater.*2021, *42*, 118. |
| ODAC-CoO-30 | PVA | 1.41 | 42 | 12@2 | *Adv. Funct. Mater.*2021, *31*, 2101239. |
| Co-NDC | PVA |  | 45.9 | 3.3@2 | *Sci. Bull.*2018, *63*, 548. |

**Supplementary Table 5.** Performance comparison of low-temperature electrochemical device.

| Energy devices | Electrolyte | Working tempera-ture (oC) | Performance | Reference |
| --- | --- | --- | --- | --- |
| Zinc-air battery | PAM-based organohydrogel electrolyte | -60 | 300h@0.5 mA cm-2  100h@1.0 mA cm-2 | This work |
| Zinc-air battery | PAM-based organohydrogel electrolyte | -40 | 21.9 mW cm-2; Specific capacity of 778.4 mAh g-1; Energy density of 918.5 Wh kg-1; 160h@1.0 mA cm-2 | This work |
| Zinc-air battery | CsOH-based electrolyte | -10 | 57.9 mW cm-2; 160 cycles@5.0 mA cm-2; 65 cycles@10.0 mA cm-2 at -10 °C; 6.5 mW cm-2 at -40 °C | *Angew. Chem. Int. Ed.* **2021**, *60*, 15281. |
| Zinc-air battery | PAA hydrogel electrolyte | -20 | 80.5 mW cm-2; Specific capacity of 691 mAhg-1; Energy density of 798 Wh kg-1 | *Angew. Chem. Int. Ed.*  **2020**, *59*, 4793. |
| Zinc-air battery | CBCs super-ion conductors | -20 | 2h of discharge at -20 °C | *Nat. Energy*  **2021**, *6*, 592. |
| Zinc-air battery | PAM/PAA  organohydrogel electrolyte | -20 | 1.44V of OCV for 0.5h at -20 °C; 10h@1 mA cm-2 | *ACS Sustainable Chem. Eng.* **2020**, *8*, 11501 |
| Zinc-air battery | PAMC | -20 | 35.8 mW cm-2; 190 cycles@2 mA cm-2 at -30 °C | *Chem. Eng. J.*  **2021**, *417*, 129179. |
| Zinc-air battery | A-PAA hydrogel electrolyte | -30 | 63.6 mW cm-2; Specific capacity of 699 mAhg-1; Energy density of 789 Wh kg-1; 500 cycles@2 mA cm-2 at -30 °C | *Energy Environ. Sci.* **2021**, *14*, 4926. |
| Zinc-air battery | PVA organohydrogel electrolyte | -35 | 1.25V of OCV for 120h at -35 °C; 8.2 mW cm-2; | *Adv. Mater.*  **2020**, *32*, 2001651. |
| Zinc-air battery | PAM-CNF/KOH/KI-based hydrogel | -40 | 10 mW cm-2  Specific capacity of 743 mAhg-1; 45h@2 mA cm-2 | [*Energy Storage Mater.*](https://www.sciencedirect.com/science/journal/24058297) [**2021**, *42*](https://www.sciencedirect.com/science/journal/24058297/42/supp/C),  88. |
| Zinc-air battery | SP-DN hydrogel electrolyte | -50 | 1.38V of OCV; 97 mW cm-2; Specific capacity of 620 mAhg-1 | *Energy Environ. Sci.*2021,14, 4451. |
| Zn/LiFePO4 hybrid battery | ZL-PAAm hydrogel electrolyte | -20 | 98% capacity retention upon cooling down to -20 °C; near 100% capacity retention with >99.5%; Coulombic efficiency over 500 cycles at -20 °C | *Adv. Funct. Mater.*  **2019**, *30*, 1907218. |
| Strain sensors | MXene nanocomposite organohydrogel | -40 | a relatively broad strain range (up to 350% strain) and a high gauge factor of 44.85 at -40 °C | *Adv. Funct. Mater.*  **2019**, *29*, 1904507. |
| Super-capacitors | PVA organohydrogel | -40 | 70.6% capacitance retained at -40 °C and 11.7% capacitance decay over 5000 charge/discharge cycles at -20 °C | *Adv. Energy Mater.*  **2018**, *8*, 1801967 |
| Li metal battery | 1M LiFSI DEE | -60 |  | *Nat. Energy*  **2021**, *6*, 303. |
| Li metal battery | 5M LiTFSI/EA + DCM | -70 | High energy (178 Wh kg-1 and power (2877 W kg-1) at @70 oC | *Angew. Chem. Int. Ed.*  **2019**, *58*, 5623. |
| Li-ion batteries | EA-based electrolyte | -70 | capacity of 20 mAh g-1 at low rate of 0.2C; 70% of capacity at room temperature | *Joule*, **2018**, *2*, 902. |
| Zn ion hybrid capacitors | Zn(ClO4)2 salty ice | -50 | 74.1% of the room temperature capacity at -60 °C; 280 days at 1 A g-1 at -30 °C | *Adv. Funct. Mater.*  **2021**, 31, 2101277. |
| PANI|LTE|Zn battery | ZnCl2-based electrolyte | -70 | 84.9 mA h g-1 and stable during over 2000 cycles with ~100% capacity retention | *Nat. Commun.*  **2020**, *11*, 4463 |
| Li-CO2 battery | DOL-based electrolyte | -60 | Discharge capacity of 8976 mAh g-1 and long lifespan of 150 cycles (1500 h) with a fixed 500 mAh g-1 capacity per cycle at -60 °C | *Adv. Funct. Mater.*  **2020**, *30*, 2001619 |
| Proton battery | 62 wt% (9.5 M) H3PO4 | -78 | Stable cycle life for  450 cycles, high round-trip efficiency of 85% | *Adv. Energy Mater.*, **2020**, *10*, 2000968. |
| Zn batteries | 2M Zn(CF3SO3)2 | -30 | Specific capacity of 285.0 mAh g-1 at -30 °C and capacity retention of 81.7% after 1000 cycles | *ACS Energy Lett.,*  **2021**, *6*, 2704. |
